1 **Hippocampal protein aggregation signatures fully distinguish pathogenic**  
2 **and wildtype *UBQLN2* in amyotrophic lateral sclerosis**

3 Kyrah M. Thumbadoo<sup>1,2</sup>, Birger V. Dieriks<sup>2,3</sup>, Helen C. Murray<sup>2,3</sup>, Molly E. V. Swanson<sup>1,3</sup>,  
4 Ji Hun Yoo<sup>2,4</sup>, Nasim F. Mehrabi<sup>2,3</sup>, Clinton Turner<sup>2,3,5</sup>, Michael Dragunow<sup>2,4</sup>, Richard L.  
5 M. Faull<sup>2,3</sup>, Maurice A. Curtis<sup>2,3</sup>, Teepu Siddique<sup>6</sup>, Christopher E. Shaw<sup>2,7</sup>, Lyndal  
6 Henden<sup>8</sup>, Kelly L. Williams<sup>8</sup>, Garth A. Nicholson<sup>8,9,10,11</sup>, Emma L. Scotter<sup>1,2</sup>

7

8 1 School of Biological Sciences, University of Auckland, Auckland, New Zealand

9 2 Centre for Brain Research, University of Auckland, Auckland, New Zealand

10 3 Department of Anatomy and Medical Imaging, University of Auckland, Auckland,  
11 New Zealand

12 4 Department of Pharmacology and Clinical Pharmacology, University of Auckland,  
13 Auckland, New Zealand

14 5 Department of Anatomical Pathology, LabPlus, Auckland City Hospital, Auckland,  
15 New Zealand

16 6 Departments of Neurology, Cell and Developmental Biology and Pathology,  
17 Northwestern University Feinberg School of Medicine, Chicago, USA

18 7 UK Dementia Research Institute Centre, Institute of Psychiatry, Psychology and  
19 Neuroscience, King's College London, United Kingdom

20 8 Macquarie University Centre for Motor Neuron Disease Research, Macquarie  
21 Medical School, Faculty of Medicine, Health and Human Sciences, Macquarie  
22 University, Sydney, New South Wales, Australia

23 9 Northcott Neuroscience Laboratory, Australian and New Zealand Army Corps  
24 (ANZAC) Research Institute, Concord, New South Wales, Australia

25 10 Faculty of Medicine, University of Sydney, Sydney, New South Wales, Australia

26 11 Molecular Medicine Laboratory, Concord Repatriation General Hospital, Concord,  
27 New South Wales, Australia

28 12

29 Corresponding author:

30 Email, [emma.scotter@auckland.ac.nz](mailto:emma.scotter@auckland.ac.nz); Telephone, +64 9 923 1350

## 31 **Acknowledgements and funding**

32 This publication is dedicated to the incredible patients and families who contribute to our  
33 research. We thank Marika Eszes at the Centre for Brain Research, University of Auckland,  
34 New Zealand; Nailah Siddique at the Northwestern University Feinberg School of  
35 Medicine, Chicago, USA; Sashika Selvaduncko and Claire Troakes at the London  
36 Neurodegenerative Diseases Brain Bank and Brains for Dementia; and the Neurological  
37 Foundation of New Zealand for their ongoing financial support of the Human Brain Bank.  
38 We also thank Fairlie Hinton and Dr. Catriona McLean at the Victorian Brain Bank, which  
39 is supported by The Florey Institute of Neuroscience and Mental Health, The Alfred and  
40 the Victorian Forensic Institute of Medicine and funded in part by Parkinson's Victoria,  
41 MND Victoria, FightMND and Yulgilbar Foundation. The imaging data reported in this  
42 paper were obtained at the Biomedical Imaging Research Unit (BIRU), operated by the  
43 Faculty of Medical and Health Sciences' Technical Services at the University of Auckland.  
44 KT was funded by a doctoral scholarship from Amelia Pais-Rodriguez and Marcus  
45 Gerbich. BVD and MD were funded by the Michael J Fox Foundation [Grant ID: 16420].  
46 BVD was also funded by a Health Research Council Sir Charles Hercus Health Research  
47 Fellowship [21/034]. ELS was supported by Marsden FastStart and Rutherford Discovery  
48 Fellowship funding from the Royal Society of New Zealand [15-UOA-157, 15-UOA-003].  
49 This work was also supported by grants from Motor Neuron Disease NZ, Freemasons  
50 Foundation of New Zealand, Matteo de Nora, Sir Thomas and Lady Duncan Trust and the  
51 Coker Family Trust (to MD), and PaR NZ Golfing. No funding body played any role in the  
52 design of the study, nor in the collection, analysis, or interpretation of data nor in writing  
53 the manuscript.

54

## 55 **Authors' contributions**

56 KMT, BVD, HCM, MEVS, JHY, NFM conducted or designed experiments; KMT, BVD,  
57 HCM, MEVS, ELS performed data analysis or designed analysis methods; CT conducted  
58 neuropathological diagnostics; MD provided study supervision and resourcing; RLMF,  
59 MAC, TS, CES coordinated the banking and use of human tissue for study; TS, CES, GAN  
60 identified the *UBQLN2* patients; KLW, LH performed relatedness analysis; KMT, BVD,

61 ELS wrote the manuscript; GAN, ELS conceived of the study. ELS designed the study. All  
62 authors read, edited, and approved the final manuscript.

63

64 **Abstract**

65 Mutations in the *UBQLN2* gene cause X-linked dominant amyotrophic lateral sclerosis  
66 (ALS) and/or frontotemporal dementia (FTD) characterised by ubiquilin 2 aggregates in  
67 neurons of the motor cortex, hippocampus, cerebellum, and spinal cord. However,  
68 ubiquilin 2 neuropathology is also seen in sporadic and familial ALS or FTD cases not  
69 caused by *UBQLN2* mutations, particularly *C9ORF72*-linked cases. This makes the  
70 mechanistic role of ubiquilin 2 mutations and the value of ubiquilin 2 pathology for  
71 predicting genotype unclear. Here we examine a cohort of 31 genotypically diverse ALS  
72 cases with or without FTD, including four cases with *UBQLN2* mutations (resulting in  
73 p.P497H, p.P506S, and two cases with p.T487I). Using double-, triple-, and five-label  
74 fluorescent immunohistochemistry, we mapped the co-localisation of ubiquilin 2 with  
75 phosphorylated TDP-43 (pTDP-43), dipeptide repeat aggregates, and p62, in the  
76 hippocampus of controls (n=5), or ALS with or without FTD in sporadic (n=19), unknown  
77 familial (n=3), *SOD1*-linked (n=1), *C9ORF72*-linked (n=4), and *UBQLN2*-linked (n=4)  
78 cases. We differentiate between i) ubiquilin 2 aggregation together with, or driven by,  
79 pTDP-43 or dipeptide repeat proteins, and ii) ubiquilin 2 self-aggregation driven by  
80 *UBQLN2* gene mutations. Together we describe a hippocampal protein aggregation  
81 signature that fully distinguishes mutant from wildtype ubiquilin 2 in ALS with or without  
82 FTD, whereby mutant ubiquilin 2 is more prone than wildtype to aggregate independently  
83 of driving factors. This neuropathological signature can be used to assess the pathogenicity  
84 of *UBQLN2* gene mutations and to understand the mechanisms of *UBQLN2*-linked disease.

85

86

87

88

89

90 **Keywords:** *UBQLN2*, ubiquilin 2, amyotrophic lateral sclerosis (ALS), frontotemporal  
91 dementia (FTD), neuropathology, hippocampus, human, TDP-43, polyGP, polyGA

92

## 93 **Introduction**

94 *UBQLN2* gene mutations are a rare cause of amyotrophic lateral sclerosis (ALS) with or  
95 without dementia, and the only known causal mutations on the X-chromosome. *UBQLN2*  
96 [NM\_013444] encodes the ubiquilin 2 protein, the best studied of five human ubiquilins,  
97 which contains a unique PXX domain comprising 12 proline-rich tandem repeats [1,2].  
98 Like other ALS- and FTD-linked degradation proteins (sequestosome 1/p62 (hereafter  
99 p62), valosin-containing protein, optineurin, and TANK-binding kinase 1), a key role for  
100 ubiquilin 2 is to bind ubiquitinated, misfolded, and aggregated protein cargos, triaging them  
101 between the proteasome and autophagy intracellular degradation pathways [3–6]. New  
102 evidence suggests that ubiquilin 2 also undergoes reversible liquid-liquid phase separation,  
103 allowing it to bind ubiquitin-labelled proteins within phase-separated stress granules. Upon  
104 ubiquitinated protein binding, ubiquilin 2 falls out of the liquid-droplet phase, plucking its  
105 cargo from the stress granule for delivery to the proteasome; ubiquilin 2 is therefore also  
106 implicated in stress granule disassembly [7–10].

107

108 These roles at the interface between RNA processing and protein degradation — two key  
109 pathways in ALS and FTD pathogenesis — underpin why ubiquilin 2 mutations cause  
110 disease. ALS and/or FTD (ALS/FTD)-causing *UBQLN2* mutations that alter residues  
111 flanking and within the PXX domain impair ubiquilin 2 binding to the proteasome, and  
112 promote self-oligomerisation and liquid-to-solid rather than liquid-liquid phase transition  
113 [9,11–14]. The mutation c.1490C>A, resulting in p.P497H, was the first disease-causing  
114 *UBQLN2* mutation identified, leading to the discovery in unrelated ALS/FTD families of  
115 mutations c.1489C>T (p.P497S), c.1516C>A (p.P506T), c.1525C>T (p.P509S) and  
116 c.1573C>T (p.P525S) all altering the PXX domain [1]. A c.1516C>T mutation, resulting  
117 in p.P506S also within the PXX domain, was later identified in a family with young onset  
118 ALS, ALS with FTD onset, or pure spastic paraplegia [15] while a c.1460C>T mutation,  
119 resulting in p.T487I just upstream of the PXX region, was found in two families with  
120 members in New Zealand and Australia [16,17]. *UBQLN2* mutations/variants have also  
121 been identified in ALS/FTD cases altering other residues within or flanking the PXX  
122 domain; in the ubiquitin-like domain; the stress-induced protein 1-like domains; or outside  
123 of known domains [18–37]. However, it is currently uncertain whether all of these

124 *UBQLN2* variants are pathogenic (disease-causing).

125

126 The neuropathology of ALS/FTD caused by pathogenic *UBQLN2* mutations is  
127 characterised by aggregated ubiquilin 2 in the motor cortex, spinal cord, cerebellum, and  
128 hippocampus [1,15,17,23,38]. We previously reported ubiquilin 2-positive aggregates in  
129 the hippocampus of an individual with p.T487I *UBQLN2*-linked ALS+FTD, but not in  
130 sporadic ALS [38]. However, ubiquilin 2 inclusions are not specific to *UBQLN2*-linked  
131 ALS/FTD cases and have been identified previously in sporadic and familial ALS, and  
132 ALS-dementia, regardless of whether ubiquilin 2 is wildtype or mutant [1,15,17,23,38,39].  
133 Some of these ubiquilin 2 inclusions are immunopositive for other ALS/FTD-linked  
134 proteins such as pan-TDP-43 or phosphorylated TDP-43 (pTDP-43), FUS, p62, optineurin,  
135 or ubiquitin [1,17,40–44]. In addition, deposition of ubiquilin 2 in the hippocampus is a  
136 characteristic feature of ALS/FTD caused by *C9ORF72* hexanucleotide repeat expansions,  
137 in which ubiquilin 2 is seen in the presence of dipeptide repeat (DPR) proteins [39]. Thus,  
138 while ubiquilin 2 is clearly involved in ALS/FTD pathogenesis regardless of aetiology, the  
139 role of *UBQLN2* mutations and the predictive value of ubiquilin 2 labelling in relation to  
140 genotype is still unclear.

141

142 There is a clear need to determine whether *UBQLN2* mutations cause ubiquilin 2  
143 neuropathology that is distinct from the wildtype ubiquilin 2 neuropathology that is seen  
144 in ALS/FTD with other genotypes. If they do, then defining a pathological signature for  
145 *UBQLN2*-linked disease will provide mechanistic insights and aid assessment of the  
146 pathogenicity of *UBQLN2* genetic variants which are not yet confirmed to be causative.  
147 Because ubiquilin 2 aggregation across a range of ALS/FTD genotypes occurs in the  
148 hippocampus, this region may provide insight into the requirements for mutant and  
149 wildtype ubiquilin 2 aggregation. Here we map the hippocampal ubiquilin 2 protein  
150 deposition signature with respect to pTDP-43, two *C9ORF72*-linked DPR proteins, and  
151 p62, in ALS/FTD with and without *UBQLN2* mutation.

## 152 **Materials and methods**

### 153 **Systematic review of *UBQLN2*-linked ALS/FTD neuropathology**

154 Journal articles were identified using PubMed that were published between Jan 1993 and  
155 September 2021. Search terms were *UBQLN2*, ubiquilin 2, amyotrophic lateral sclerosis,  
156 and ALS, combined with neuropathology, tissue, or immunohistochemistry. Articles which  
157 did not contain ubiquilin 2 neuropathological information in post-mortem ALS/FTD  
158 human brain tissue, were not primary research articles, or were not published in English  
159 were excluded. Seven papers were identified from which neuropathological data for TDP-  
160 43, ubiquilin 2, ubiquitin, p62, *C9ORF72*-linked DPR proteins, FUS, and SOD1 protein  
161 aggregates in the spinal cord and hippocampus were extracted and tabulated.

### 162 **Patient demographics and hippocampal brain tissue**

163 Formalin-fixed paraffin-embedded (FFPE) post-mortem brain tissue from 5 neurologically  
164 normal and 28 ALS cases with or without FTD, processed as previously described [45]  
165 were obtained from the Neurological Foundation Human Brain Bank at the Centre for  
166 Brain Research, Auckland, New Zealand. Patient demographic and clinical information is  
167 summarised in Table S1. These included nineteen cases with sporadic ALS (one of whom  
168 had co-morbid FTD), three with familial ALS of unknown genotype, one with *SOD1*-  
169 linked ALS (p.E101G), four with *C9ORF72*-linked ALS, and one with ALS+FTD with the  
170 *UBQLN2* p.T487I mutation (pedigree ID FALS5 IV:18 in Fig. 1A of [17] and in this report;  
171 and coded MN17 in Figure 1D of [38] and in this report). It should be noted that the latter  
172 (MN17/ FALS5 IV:18) was stored in fixative for 7 years before embedding. All non-  
173 *SOD1*-linked NZ cases had confirmed pTDP-43 proteinopathy in the motor cortex. FFPE  
174 hippocampal tissue was also obtained from the Victoria Brain Bank from an affected family  
175 member of the *UBQLN2* p.T487I case, who had ALS+FTD and was also positive for the  
176 mutation (pedigree ID V:7 in Figure 1A of [17] and in this report); and from two unrelated  
177 *UBQLN2*-linked cases from the London Neurodegenerative Diseases Brain Bank and  
178 Brains for Dementia (p.P506S (ALS+FTD), pedigree ID II.2 in Fig. 1B of [15]), and the  
179 Northwestern University Feinberg School of Medicine, USA (p.P497H (ALS), pedigree  
180 ID V:I of Family #186 in Fig. 1A of [1]). All clinical and neuropathological diagnoses were  
181 conducted as described previously [1,15,17,38].

## 182 **Double-, triple-, and five-label fluorescent immunohistochemistry**

183 Fluorescence immunohistochemistry was performed as described previously [46,47].  
184 Briefly, tissue sections were cut with a microtome in the transverse plane at a thickness of  
185 7-10  $\mu\text{m}$  and mounted onto Superfrost Plus slides (Thermo Fisher Scientific). Mounted  
186 sections were dried at room temperature for a minimum of 1 week before  
187 immunohistochemistry. Slides were heated to 60 °C for 1 h on a hot plate, then dewaxed  
188 and rehydrated through a xylene-alcohol-water series: 100% xylene, 2x 30 min; 100%  
189 ethanol, 2x 15 min; 95%, 85%, 75% ethanol, 5 min each; water 3x 5 min. Antigens were  
190 retrieved through immersion in 10 mM sodium citrate buffer (0.05% Tween 20, pH 6.0) in  
191 a pressure cooker (Retriever 2100, Electron Microscopy Sciences) at 120 °C for 20 min  
192 and cooled to room temperature for 100 min. Sections were washed 3x 5 min in 1x  
193 phosphate-buffered saline (PBS) and wax borders were drawn with an ImmEdge  
194 Hydrophobic Barrier PAP pen. Sections were permeabilised in PBS-T (PBS with 0.2%  
195 Triton™ X100) for 15 min at 4 °C, followed by 3x 5-min PBS washes. Lipofuscin  
196 autofluorescence was quenched using TrueBlack® Lipofuscin quencher (Biotium) 1:20 in  
197 70% ethanol for at least 30 seconds followed by three vigorous water washes. Sections  
198 were blocked with 10% normal goat or donkey serum (Thermo Fisher Scientific) in PBS  
199 for 1 h, then incubated at 4 °C overnight with primary antibodies (Table S2). Following  
200 PBS washes, species- and isotype-specific secondary antibodies and Hoechst 33342  
201 nuclear stain (Table S2) were applied for 3 h in 1% normal goat or donkey serum at room  
202 temperature. After final 3x 5-min PBS washes, sections were coverslipped with #1.5  
203 coverslips (Menzel-Gläser) using ProLong® Gold Antifade Mountant (Thermo Fisher  
204 Scientific). Neurologically normal control samples, bleed-through, secondaries-only, and  
205 cross-reactivity control sections were included for each staining (Figs. S2, S3, S4, S5, S6,  
206 S7, S8).

## 207 **Image acquisition**

208 Wide-field double- and triple-label images were acquired using a Nikon Eclipse Ni-E  
209 microscope (20x magnification, 0.50 NA) with a Nikon DS-Ri2 camera using NIS  
210 elements (Nikon, version 4.20). Sections were imaged with the same exposure time and  
211 gain settings for each staining combination where possible. *UBQLN2*-linked ALS+FTD



212 case V:7-p.T487I showed consistently poor Hoechst immunoreactivity, while *UBQLN2*-  
213 linked ALS+FTD case MN17-p.T487I showed poor immunoreactivity overall, likely due  
214 to long-term fixation, therefore a longer exposure was used for both cases when imaging.

215

216 Multiplex (five-label) images were acquired using a Zeiss Z2 Axioimager with a  
217 MetaSystems VSlide slide scanning microscope (20x dry magnification lens, 0.9 NA) with  
218 a Colibri 7 solid-state fluorescent light source. Single filters, as described and validated  
219 previously [48], were used to excite fluorophores and detect the following wavelengths:  
220 Filter set #1 (LED 385; Em 447/60 nm), #3 (LED 475; Em 527/20 nm), #4 (LED 555; Em  
221 580/23 nm), #5 (LED 590; Em 628/32 nm), #6 (LED 630; Em 676/29 nm), and #7 (LED  
222 735; Em 809/81 nm) and visualised with MetaFer software (MetaSystems, v.3.12.1)  
223 equipped with a CoolCube 4m TEC (monochrome) sCMOS digital camera. Image tiles  
224 were seamlessly stitched using MetaCyte software, and stitched images were extracted  
225 using VSViewer software (MetaSystems, v.1.1.106).

226

227 Stimulated emission depletion (STED) images were acquired using an Abberior Facility  
228 STED microscope (60x UPLXAPO oil immersion lens, 1.42 NA) using ImSpector  
229 Lightbox software (Specim, v.16.3.13779). A 561-nm pulsed diode laser was used to  
230 excite Alexa Fluor 594, and a 640-nm diode laser was used to excite Alexa Fluor 647. For  
231 STED imaging, a pulsed 775-nm laser was used for depletion of both fluorophores. After  
232 scanning, the images were processed using the PureDenoise plugin [49] for ImageJ  
233 (National Institutes of Health, USA v1.53f51).

234

235 Confocal images of triple-label immunohistochemically stained tissue were acquired using  
236 a Zeiss LSM 800 Airyscan confocal laser scanning microscope (63x magnification oil  
237 immersion lens, 1.4 NA, Z-step 0.25  $\mu\text{m}$ ) with ZEN software (Carl Zeiss, ZEN 3.1 Blue  
238 Edition). Maximum intensity Z-projections and orthogonal projections were generated and  
239 processed using ZEN 3.1 software.

240

241 Final figures were composed using Adobe Photoshop CC (Adobe Systems Incorporated,  
242 v20.0.6).

## 243 **Relatedness analysis**

244 To further examine the p.T487I mutation in ALS/FTD, genome-wide genotype data from  
245 the family of *UBQLN2*-linked ALS+FTD case MN17 (FALS5) and another Australian  
246 family with an identical p.T487I mutation (FALS14) were analysed to determine whether  
247 they inherited the mutation from a common ancestor (pedigree in Fig. S1, sample  
248 information in Table S3). These two families were previously reported to share a haplotype  
249 identical-by-state over the *UBQLN2* locus [17], but genealogy analysis had been unable to  
250 link the pedigrees. Three individuals from FALS5 (all affected, pedigree IDs III:8, IV:9,  
251 IV:18 (MN17)) and two individuals from FALS14 (pedigree IDs II:1 (unaffected) and III:2  
252 (affected)) underwent SNP genotyping using the Illumina Infinium Global Screening Array  
253 v2.0. Identity-by-descent (IBD) analysis was performed using XIBD software [50] with  
254 the combined HapMap Phase II and III European (CEU) cohort as a reference dataset.  
255 SNPs in high linkage disequilibrium ( $r^2 > 0.95$ ) or SNPs with a low minor allele frequency  
256 (MAF < 0.01) were removed from analysis, as well as SNPs with missing genotype calls  
257 in two or more samples. 39,002 SNPs remained for analysis and 211 IBD segments greater  
258 than 3 cM were identified. The degree of relationship was estimated for each pair of  
259 samples using the lengths of inferred IBD segments as in Estimation of Recent Shared  
260 Ancestry [51].

## 261 **Results**

### 262 **Ubiquilin 2 labelling in previous studies fails to discriminate between *UBQLN2*-linked** 263 **and other genotypes of ALS/FTD**

264 Systematic review of the literature describing ubiquilin 2 neuropathology in human  
265 ALS/FTD identified 137 results, of which 7 articles met the criteria for full review. The  
266 neuropathology of ubiquilin 2 with respect to six other ALS/FTD-linked proteins in  
267 specific CNS regions is summarised in Fig. 1. Ubiquilin 2 neuropathology in the spinal  
268 cord is present in ALS/FTD cases with *UBQLN2* mutations, but is also frequently found  
269 aggregating in sporadic ALS cases and in ALS/FTD with other genotypes where it  
270 presumably co-localises with aggregates of pTDP-43 and/or mutant proteins. Ubiquilin 2  
271 neuropathology in the hippocampal molecular layer was most frequently reported upon,  
272 being found in *UBQLN2*-linked and *C9ORF72*-linked ALS/FTD. Ubiquilin 2

273 neuropathology in the hippocampal granule cell layer was inconsistent between cases of  
274 *UBQLN2*-linked ALS/FTD but was found in all cases of *C9ORF72*-linked ALS/FTD and  
275 therefore also in “ALS-dementia” ([1], later confirmed to be *C9ORF72*-positive) and in a  
276 single sporadic ALS/FTD case. Overall, neither ubiquilin 2 staining alone nor in  
277 combinations previously tested could distinguish mutant ubiquilin 2 aggregation in  
278 *UBQLN2*-linked ALS/FTD from wildtype ubiquilin 2 aggregation in other ALS/FTD  
279 genotypes.

## 280 Ubiquilin 2 and pTDP-43 protein pathology

### 281 *Sporadic ALS: No cases showed hippocampal ubiquilin 2, but certain cases had* 282 *hippocampal pTDP-43*

283 No hippocampal ubiquilin 2 pathology was observed in any sporadic ALS case. Of the 19  
284 sporadic ALS cases examined (one of which had co-morbid FTD), 6 cases (32%; including  
285 the case with FTD), had perinuclear pTDP-43-positive neuronal cytoplasmic inclusions  
286 (NCIs) in the granule cells of the dentate gyrus but not the molecular layer. These ranged  
287 in density from sparse to frequent, suggestive of stage 4 pTDP-43 proteinopathy [52], and  
288 were always ubiquilin 2-negative (Fig. 2A1-F1, white arrowheads). The remaining 13  
289 sporadic ALS cases (68%) were devoid of either ubiquilin 2 or pTDP-43 in both the granule  
290 cell and molecular layers of the hippocampus (Fig. S2). Similarly, no ubiquilin 2 or pTDP-  
291 43 aggregates were observed in 5 controls, 3 familial ALS cases of unknown aetiology  
292 (unrelated to one another; MN11, MN14, and MN21), or a *SOD1*-linked ALS case (MN24,  
293 p.E101G), nor when primary antibodies were omitted (Fig. S2).

### 294 *UBQLN2-linked ALS/FTD: All cases showed hippocampal molecular layer ubiquilin 2,* 295 *some also had hippocampal granule cell layer pTDP-43*

296 All *UBQLN2*-linked ALS/FTD cases had ubiquilin 2-positive but pTDP-43-negative  
297 punctate aggregates in the hippocampal molecular layer, albeit at variable loads (Fig. 2G-  
298 J, green arrowheads). They appeared to be localised to the dendritic spines of the  
299 hippocampal granule cells, as reported previously in *UBQLN2*-linked ALS/FTD and in  
300 mutant *UBQLN2* rodent models [1,53]. Only ALS+FTD case V:7 carrying the *UBQLN2*

301 p.T487I mutation showed pTDP-43 co-localisation with this molecular layer ubiquilin 2,  
302 and this was only in a single aggregate (Fig. 2I, white arrow in main image).

303

304 In the granule cell layer, one *UBQLN2* p.P497H case (Fig. 2G) and one *UBQLN2* p.T487I  
305 case (MN17, Fig. 2H) were devoid of ubiquilin 2 and pTDP-43 aggregates, consistent with  
306 previous findings [1,38]. In contrast, *UBQLN2* p.T487I case V:7 showed very sparse  
307 pTDP-43-positive cytoplasmic aggregates in the granule cell layer that were negative for  
308 ubiquilin 2 (Fig. 2I2, white arrowhead). In further contrast, and consistent with Gkazi and  
309 colleagues [15], a *UBQLN2* p.P506S case had abundant pTDP-43-positive cytoplasmic  
310 aggregates in the granule cell layer, that either co-localised with ubiquilin 2 (Fig. 2J1,  
311 unfilled green arrowheads) or were independent of ubiquilin 2 (Fig. 2J and J3, white  
312 arrowheads). Importantly, while punctate ubiquilin 2 aggregates in the molecular layer  
313 dendrites in all *UBQLN2*-linked ALS/FTD cases were independent of pTDP-43, the larger  
314 ubiquilin 2 aggregates in the granule cell layer somata in the p.P506S case were always co-  
315 localised with pTDP-43. Mutant ubiquilin 2 aggregation in the granule cell layer was  
316 therefore likely scaffolded or 'seeded' by pTDP-43, but aggregation in the molecular layer  
317 was independent of a known scaffold.

318 ***C9ORF72-linked ALS: All cases showed hippocampal molecular layer and granule cell***  
319 ***layer ubiquilin 2, some also had hippocampal granule cell layer pTDP-43***

320 *C9ORF72*-linked ALS/FTD cases are known to be positive in the hippocampus for  
321 aggregates of both ubiquilin 2 [39,54] and dipeptide repeat (DPR) proteins translated from  
322 the expanded repeat [55,56]. *C9ORF72*-positive ALS cases MN2, MN18, and MN23  
323 showed numerous punctate dendritic ubiquilin 2 aggregates and ubiquilin 2-positive  
324 dystrophic neurites in the molecular layer (Fig. 2K1-M1, green arrowheads), and compact,  
325 star-shaped ubiquilin 2 aggregates in the granule cell layer cell bodies (Fig. 2K2-M2, green  
326 arrowheads). These *C9ORF72* cases were devoid of hippocampal pTDP-43. In contrast,  
327 *C9ORF72*-positive case MN28 had similar granule cell and molecular layer ubiquilin 2  
328 aggregates (Fig. 2N1-3, green arrowheads), but with additional pTDP-43 aggregates in the  
329 granule cell layer that co-localised very rarely with ubiquilin 2 (Fig. 2N1, unfilled green  
330 arrowhead) or were independent of ubiquilin 2 (Fig. 2N3, white arrowheads). Overall, in

331 all *C9ORF72*-linked ALS cases both punctate ubiquilin 2 aggregates in the molecular layer  
332 dendrites and the majority of ‘starburst’ ubiquilin 2 aggregates in the granule cell layer  
333 somata were independent of pTDP-43. Wildtype ubiquilin 2 was therefore not ‘seeded’ to  
334 aggregate in the granule cell layer by pTDP-43, and aggregated in the molecular layer  
335 independently of a known scaffold.

### 336 **Ubiquilin 2 and DPR protein pathology**

#### 337 ***UBQLN2-linked ALS/FTD: DPR proteins were not components of hippocampal*** 338 ***ubiquilin 2 pathology***

339 As expected, all four *UBQLN2*-linked ALS/FTD cases were devoid of poly(glycine-  
340 arginine) (polyGA) and poly(glycine-proline) (polyGP) DPR aggregates (Fig. 3A-D), thus  
341 DPR proteins were not co-localised with the ubiquilin 2 detected in the molecular layer of  
342 all four cases (Fig. 3A1-D1, green arrowheads), nor were DPR proteins co-localised with  
343 the ubiquilin 2 (and therefore pTDP-43) in the granule cell layer of *UBQLN2*-linked case  
344 p.P506S (Fig. 3D2, green arrowhead).

#### 345 ***C9ORF72-linked ALS: PolyGP and polyGA DPR aggregates were requisite components*** 346 ***of ubiquilin 2 pathology***

347 The abundant punctate and skein-like ubiquilin 2 aggregates in the molecular layer  
348 dendrites of *C9ORF72*-linked ALS cases, as described in Fig. 2, were all polyGA- and  
349 polyGP-negative (Fig. 3E1-H1”, green arrowheads). However, as reported previously, all  
350 *C9ORF72*-linked cases had polyGA and/or polyGP aggregates in the granule cell layer  
351 somata (Fig. 3E2-H2”). PolyGP aggregates were rare in all cases and virtually always co-  
352 localised with polyGA (Fig. 3E2 & H2, pink arrowheads). PolyGA aggregates were often  
353 (Fig. 3E2-H2, yellow arrowheads) but not always (Fig. 3E2-H2, red and pink arrowheads)  
354 co-localised with ubiquilin 2.

355

356 Although these granule cell layer DPR aggregates were sometimes devoid of ubiquilin 2  
357 co-labelling, the converse was not observed. Granule cell layer ubiquilin 2 aggregates  
358 always co-localised with DPR aggregates; ubiquilin 2 aggregates were never independent  
359 of DPR proteins (Fig. 3E2-H2, yellow arrowheads [1,38,39]). Even *C9ORF72*-positive

360 case MN28 (Fig. 3H), which had granule cell layer pTDP-43 aggregates, showed granule  
361 cell layer ubiquilin 2 that always co-localised with DPR aggregates. Further investigation  
362 in this case demonstrated that 1-2 cells per section of the dentate gyrus granule cell layer  
363 contained a DPR aggregate that was surrounded by a pTDP-43 ‘shell’, either with polyGA,  
364 polyGP, and ubiquilin 2 co-localisation (Fig. S8A) or with polyGA and polyGP but without  
365 ubiquilin 2 (Fig. S8B). This supports a previous report that ubiquilin 2 in *C9ORF72*-linked  
366 cases rarely co-localises with granule cell layer pTDP-43, and if so, only when DPRs are  
367 also present in the aggregate [57]. Therefore, wildtype ubiquilin 2 aggregation was likely  
368 ‘seeded’ in the granule cell layer by polyGA, but not by pTDP-43.

### 369 **Ubiquilin 2 and p62 protein pathology**

#### 370 ***UBQLN2-linked ALS/FTD versus C9ORF72-linked ALS: Only mutant ubiquilin 2*** 371 ***aggregates in the hippocampal molecular layer were p62 positive***

372 Like ubiquilin 2, p62 is a ubiquitin-binding protein which acts as a cargo adaptor for both  
373 the ubiquitin-proteasome system and autophagy and is linked aetiologically to ALS [58–  
374 61]. We sought to investigate whether the ubiquilin 2 aggregates identified in the molecular  
375 layer dendrites in both *UBQLN2*-linked and *C9ORF72*-linked cases were p62 positive. In  
376 the four *UBQLN2*-linked ALS/FTD cases, the mutant ubiquilin 2 aggregates in the  
377 molecular layer co-localised with p62 (Fig. 4A-D, orange arrowheads). Only very  
378 occasionally were ubiquilin 2 aggregates in this region found to be p62 negative (Fig. 4A-  
379 D, green arrowheads). In contrast, in *C9ORF72*-linked ALS cases the wildtype ubiquilin 2  
380 aggregates in the molecular layer only very rarely co-localised with p62 (Fig. 4E, orange  
381 arrowheads) and were predominantly p62 negative. Therefore, mutant but not wildtype  
382 ubiquilin 2 promotes or scaffolds the co-aggregation of p62.

383

384 To further clarify the extent to which ubiquilin 2 aggregates were p62 labelled in *UBQLN2*-  
385 and *C9ORF72*-linked cases, we performed confocal microscopy of molecular layer  
386 aggregates in two cases with representative molecular layer ubiquilin 2 pathology  
387 (*UBQLN2* p.P506S, and *C9ORF72*-positive MN28). This confirmed that mutant ubiquilin  
388 2 aggregates in the molecular layer in *UBQLN2*-linked ALS/FTD were almost all co-  
389 localised with p62 (Fig. 4F), while wildtype ubiquilin 2 aggregates in the molecular layer

390 in *C9ORF72*-linked ALS were very rarely p62 positive (Fig. 4G). Further, the mutant  
391 ubiquilin 2 aggregates were morphologically distinct from wildtype; mutant ubiquilin 2  
392 formed small compact aggregates (Fig. 4F) while wildtype ubiquilin 2 formed both small  
393 compact aggregates *and* wispy skein-like structures (Fig. 4G).

#### 394 **Combined neuropathological signatures discriminate between *UBQLN2*-linked,** 395 ***C9ORF72*-linked, sporadic, and unknown familial cases**

396 Integration of all neuropathological findings (Fig. 5) revealed a characteristic hippocampal  
397 neuropathological signature for *UBQLN2*-linked ALS/FTD, which was distinct from that  
398 in other forms of ALS/FTD.

399

400 Sporadic ALS cases were wholly devoid of hippocampal ubiquilin 2 or DPR protein  
401 pathology, with a minority of cases showing pTDP-43 aggregates in the granule cells that  
402 were ubiquilin 2 negative. Thus, wildtype ubiquilin 2 is not seeded/ scaffolded to aggregate  
403 by pTDP-43 aggregation.

404

405 Ubiquilin 2 hippocampal pathology was present in both *UBQLN2*-linked ALS/FTD and  
406 *C9ORF72*-linked ALS, but these genotypes could be discriminated when ubiquilin 2 was  
407 co-labelled with pTDP-43, DPR proteins, or p62. *C9ORF72*-linked cases always showed  
408 granule cell layer ubiquilin 2 that co-localised with DPR aggregates, but rarely pTDP-43.  
409 This supports the lack of seeding of wildtype ubiquilin 2 aggregation by pTDP-43, but  
410 suggests that wildtype ubiquilin 2 can be seeded by polyGA. In contrast, *UBQLN2*-linked  
411 cases showed granule cell layer ubiquilin 2 if co-localised pTDP-43 was present.  
412 Therefore, mutant ubiquilin 2 is more aggregation-prone than wildtype, being seeded by  
413 pTDP-43.

414

415 In addition, *C9ORF72*-linked cases showed molecular layer ubiquilin 2 that was wispy or  
416 punctate and predominantly p62 negative, while *UBQLN2*-linked cases showed molecular  
417 layer ubiquilin 2 that was punctate and always p62 positive. Mutant but not wildtype  
418 ubiquilin 2 aggregates thus promote the co-aggregation of p62, and this may relate to their

419 conformational differences. Overall, mutant ubiquilin 2 causes unique neuropathology that  
420 is shared by p.P506S, p.P497H, and p.T487I ubiquilin 2 (Fig. 6).

#### 421 ***UBQLN2* p.T487I mutation in ALS/FTD families FALS5 and FALS14 was inherited** 422 **from a common ancestor**

423 Since the initial report by Williams et al. [17] of an identical *UBQLN2* p.T487I mutation  
424 in ALS families FALS5 and FALS14, we report here that cases MN17 (IV:18) and V:7  
425 from family FALS5 developed ALS+FTD, indicating that FTD is part of the clinical  
426 phenotype in that family. To further examine relatedness between the families and confirm  
427 that the *UBQLN2* p.T487I mutation arose in a common founder, we performed identity-  
428 by-descent (IBD) analysis. IBD segments were identified over the *UBQLN2* locus between  
429 all four affected individuals from both families (Table 1), while there were no IBD  
430 segments inferred over *UBQLN2* between the affected individuals from FALS5 and the  
431 unaffected individual from FALS14 who did not carry the *UBQLN2* p.T487I mutation. The  
432 interval shared by all four affected individuals spanned rs952836 to rs6423133 and is 68  
433 cM in length. This confirms a founder effect of *UBQLN2* p.T487I in FALS5 and FALS14.  
434 The genotyped individuals across these families are estimated to be 4th- to 5th-degree  
435 relatives (1st cousins once removed - 2nd cousins) (Table 2), now confirming segregation  
436 of the *UBQLN2* p.T487I mutation in 17 individuals from the proposed combined Australia-  
437 New Zealand pedigree and providing further strong genetic evidence, in addition to the  
438 neuropathological evidence, that *UBQLN2* p.T487I is pathogenic for ALS/FTD.

#### 439 **Discussion**

440 ALS shows considerable clinical, pathological, and genetic heterogeneity [62–64]. While  
441 TDP-43 proteinopathy is seen in 97% of cases [40,43,65], ALS/FTD-causing genetic  
442 mutations can cause deposition of the encoded mutant protein leading to additional  
443 pathological aggregate signatures. We previously exploited this to infer *C9ORF72* repeat  
444 expansion genotypes [56,66] through neuropathological screening of our New Zealand  
445 ALS cases [38]. Mutant *SOD1* [67,68], *FUS* [44], and certain other genotypes [69,70] can  
446 also be inferred from neuropathology. However, for many ALS/FTD genes — particularly  
447 those such as *TARDBP*, *SQSTM1*, and *UBQLN2* that encode proteins already within the  
448 hallmark TDP-43 inclusions — no completely discriminating neuropathology has been



449 reported [42,69,71–75]. This has hampered the validation of pathogenicity of novel  
450 variants in these genes, in turn obscuring understanding of protein domains and molecular  
451 processes important to ALS/FTD pathogenesis. However, we report here a unique  
452 neuropathological signature for mutant ubiquilin 2 in the hippocampus that discriminates  
453 *UBQLN2*-linked ALS/FTD cases from all others tested.

#### 454 **pTDP-43 in *UBQLN2*-linked cases: An independent pathology**

455 Before discussing the unique pattern of hippocampal ubiquilin 2 pathology shared by  
456 *UBQLN2*-linked cases, it must first be noted that pTDP-43 deposition was variable. Two  
457 of the four *UBQLN2*-linked cases were devoid of granule cell layer pTDP-43 aggregates  
458 (p.P497H (ALS) and MN17-p.T487I (ALS+FTD)), one case had very sparse granule cell  
459 layer pTDP-43 aggregates that were ubiquilin 2-negative (V:7-p.T487I (ALS+FTD)), and  
460 one case showed frequent granule cell layer pTDP-43 aggregates that were mostly  
461 ubiquilin 2-positive (p.P506S (ALS+FTD)). Although pTDP-43 aggregates are nearly  
462 ubiquitous in the ALS spinal cord and motor cortex, only in ~15-30% of ALS cases are  
463 they found in the hippocampus [52,76]. Our findings suggest that sequential pTDP-43  
464 deposition occurs in the context of *UBQLN2*-linked ALS/FTD just as it does in sporadic  
465 and *C9ORF72*-linked ALS/FTD.

466

467 Because pTDP-43 deposition correlates regionally with neurodegeneration, including in  
468 the hippocampus [39,52,57,77], hippocampal pTDP-43 has been proposed to promote  
469 hippocampal cell loss and the development of FTD [39]. Indeed, pTDP-43 is seen in the  
470 hippocampus in 80-100% of behavioural variant FTD (bvFTD) cases compared to only 15-  
471 30% of ALS cases [76,77]. The sequential regional deposition of pTDP-43 in bvFTD  
472 occurs in almost the reverse direction to that in ALS, with severe pTDP-43 pathology  
473 progressing from the orbitofrontal regions and rhinal cortex, via the hippocampus and  
474 anterior cingulate cortex to the motor cortex and spinal cord [76,77]. Therefore, ALS cases  
475 that also manifest with FTD are highly likely to have pTDP-43 in the anterior cingulate  
476 and hippocampus [76].

477

478 Indeed, three of the four cases with FTD in our study cohort (75%) showed hippocampal  
479 granule cell layer pTDP-43 aggregates. These were the *UBQLN2* p.P506S case (initial  
480 presentation of FTD progressing to ALS), *UBQLN2*-linked case V:7-p.T487I (complex  
481 neuropsychiatric history prior to diagnosis of ALS with personality and behavioural  
482 changes), and sporadic case MN15 (initial presentation of FTD progressing to ALS). Also  
483 fitting this paradigm, the *UBQLN2* p.P497H case did not have FTD and was devoid of  
484 granule cell layer pTDP-43 aggregates. The exception to this pattern in ALS+FTD was  
485 *UBQLN2*-linked case MN17-p.T487I in which initial presentation was ALS, yet despite  
486 later manifesting FTD did not have granule cell layer pTDP-43 aggregates. Conversely,  
487 five of the six sporadic ALS cases with hippocampal pTDP-43, and *C9ORF72*-linked case  
488 MN28 with hippocampal pTDP-43, had no clinical history of FTD. Therefore, while FTD  
489 cases frequently have hippocampal granule cell layer TDP-43, the converse is not true,  
490 such that having hippocampal pTDP-43 does not necessarily predict FTD phenotype.

491

492 *UBQLN2* and *C9ORF72* mutations are more likely than other genes to cause mixed  
493 ALS/FTD phenotypes [1,32,36,63,65,78–81] so hippocampal deposition of ubiquilin 2  
494 may further promote FTD phenotype.

#### 495 **Wildtype ubiquilin 2 pathology in *C9ORF72*-linked cases**

496 Hippocampal ubiquilin 2 deposition is a known and striking feature of *C9ORF72*-linked  
497 ALS/FTD [39]. In our *C9ORF72*-linked ALS cases, large stellate granule cell layer  
498 ubiquilin 2 was found to preferentially co-localise with the aggregation-prone polyGA  
499 DPR protein compared to polyGP. Furthermore, polyGP aggregates were very rarely  
500 independent of polyGA. These findings support the emerging consensus that polyGA  
501 aggregates ‘seed’ polyGP protein aggregation [82–84]. Similar observations were made by  
502 Mackenzie and colleagues [57] of aggregates with a core of polyGA surrounded by an  
503 aggregated TDP-43 shell; a finding recapitulated here and supported by *in vitro* work  
504 showing polyGA aggregation preceding TDP-43 accumulation [85]. The ability of DPR  
505 proteins to seed ubiquilin 2 however, appears more complex. We previously showed  
506 ubiquilin 2 at the core of polyGP-positive aggregates, but we did not co-label for polyGA  
507 [38]. STED imaging in the current study shows that ubiquilin 2 may either surround

508 polyGA or be enmeshed with it, suggesting that in *C9ORF72*-linked ALS pathogenesis,  
509 the interaction between aggregating polyGA and ubiquilin 2 may be an early event.

510

511 In contrast to ubiquilin 2 co-aggregation with large stellate DPR proteins in the granule  
512 cell layer, small neuritic ubiquilin 2 aggregates in *C9ORF72*-linked cases punctuated the  
513 molecular layer seemingly independent of a nucleating protein. The neurites in which these  
514 small aggregates are found likely derive from the granule cells themselves [86,87], so DPR  
515 protein inclusions in the somata may promote the aggregation of ubiquilin 2 in the dendrites  
516 of the same cell. DPR aggregates can sequester proteasome components [88–90], and loss  
517 of *C9ORF72* protein function in cells expressing the DPR-encoding variant 2 [91] can  
518 impair autophagy [92–97], which may underpin wildtype ubiquilin 2 aggregation in the  
519 molecular layer in *C9ORF72*-linked cases.

## 520 **Mutant ubiquilin 2 pathology in *UBQLN2*-linked cases: A neuropathological** 521 **signature**

522 Even in its wildtype state, ubiquilin 2 intrinsically self-assembles [3] but there is now ample  
523 biophysical evidence demonstrating that mutations to ubiquilin 2 confer an increased  
524 propensity to oligomerise and undergo aberrant LLPS, forming insoluble aggregates within  
525 the cell [8,9,12,98–100]. Here we confirm that mutant ubiquilin 2 in the human  
526 hippocampal granule cell dendrites (molecular layer) is more aggregation-prone than  
527 wildtype ubiquilin 2, requiring no aggregated protein scaffold or protein aggregation event  
528 in the granule cell soma (granule cell layer).

529

530 Our study additionally finds that p62 labelling is essential, while pTDP-43 labelling is  
531 dispensable, to confirm cases as being *UBQLN2*-linked. P62 co-localises with pTDP-43  
532 aggregates and DPR proteins in ALS/FTD [55,56,101], or with hyperphosphorylated tau  
533 in a range of tauopathies [102–104], or with mutant  $\alpha$ -synuclein in synucleinopathies  
534 [104,105]. Given this promiscuity for substrates, discrimination between mutant and  
535 wildtype ubiquilin 2 by p62 suggests that there are structural or biochemical features of  
536 mutant ubiquilin 2 that may be specifically druggable.

537

538 In addition to mechanistic insights, the mutant ubiquilin 2 neuropathological signature we  
539 describe will enable classification of *UBQLN2* variants of uncertain significance. To date,  
540 seven missense mutations in *UBQLN2* have been designated by ClinVar as pathogenic or  
541 likely pathogenic (resulting in p.M392V, p.Q425R, p.P440L, p.P497H, p.P497L, p.P497S,  
542 p.P506T, <https://www.ncbi.nlm.nih.gov/clinvar/>, [106]). However, 23 other *UBQLN2*  
543 missense changes listed in ClinVar are classified as benign or of uncertain significance,  
544 including c.1516C>T resulting in p.P506S. Also, although segregation in a large number  
545 of family members in the original report supported pathogenicity of *UBQLN2* c.1460C>T  
546 (p.T487I), it is not listed in ClinVar, leaving individual diagnostics labs to perform  
547 classification for patient reporting. For many rare *UBQLN2* variants, particularly those  
548 found in apparent sALS cases, the implications of a positive genetic result for patients have  
549 remained unclear. We encourage uptake of this hippocampal ubiquilin 2 neuropathology  
550 signature, by other labs or in collaboration with the authors hereof, as a tool to explore  
551 *UBQLN2* variant pathogenicity.

## 552 **Conclusion**

553 Ubiquilin 2 aggregates are seen in the hippocampus of ALS/FTD cases across a range of  
554 genotypes. Wildtype ubiquilin 2 is somewhat aggregation-prone; it co-aggregates with  
555 polyGA, but not pTDP-43 and it does not promote the co-aggregation of p62. Mutant  
556 ubiquilin 2 is more aggregation-prone than wildtype; either co-aggregating with pTDP-43  
557 or aggregating independently of a known scaffold, and in turn promoting the co-  
558 aggregation of p62. This hippocampal ubiquilin 2 neuropathology signature demonstrates  
559 that ubiquilin 2 aggregation is likely to play a mechanistic role in *C9ORF72*-linked and  
560 *UBQLN2*-linked ALS/FTD, and provides a definitive framework for exploring the  
561 biological implications of *UBQLN2* genetic variation.

562 **List of abbreviations**

|     |         |                                                 |
|-----|---------|-------------------------------------------------|
| 563 | ALS     | Amyotrophic lateral sclerosis                   |
| 564 | bvFTD   | Behavioural variant FTD                         |
| 565 | C9ORF72 | Chromosome 9 open reading frame 72              |
| 566 | DPR     | Dipeptide repeat                                |
| 567 | FFPE    | Formalin-fixed paraffin-embedded                |
| 568 | FTD     | Frontotemporal dementia                         |
| 569 | IBD     | Identity by descent                             |
| 570 | LLPS    | Liquid-liquid phase separation                  |
| 571 | NCI     | Neuronal cytoplasmic inclusions                 |
| 572 | PBS     | Phosphate-buffered saline                       |
| 573 | PolyGA  | Poly(glycine-arginine)                          |
| 574 | PolyGP  | Poly(glycine-proline)                           |
| 575 | pTDP-43 | Phosphorylated TDP-43                           |
| 576 | SOD1    | Superoxide dismutase                            |
| 577 | STED    | Stimulated emission depletion                   |
| 578 | SQSTM1  | Sequestosome 1                                  |
| 579 | TDP-43  | Transactive response DNA binding protein 43 kDa |

580 **Disclosures and declarations**

581 **Data transparency**

582 The datasets used and/or analysed during the current study are available from the  
583 corresponding author on reasonable request.

584

585 **Compliance with ethical standards**

586 **Conflicts of interest**

587 The authors declare that they have no conflicts of interest.

588

589 **Research involving human participants**

590 All protocols were approved by the University of Auckland Human Participants Ethics  
591 Committee (New Zealand) and carried out as per approved guidelines. This study was also  
592 approved by the Human Research Ethics Committee of Macquarie University  
593 (520211013428875).

594

595 **Informed consent**

596 Informed donor consent and ethical approvals were obtained at each site as described  
597 previously [1,15,17,38].

598

599

## 600 **References**

- 601 1. Deng H-XX, Chen W, Hong S-TT, Boycott KM, Gorrie GH, Siddique N, et al.  
602 Mutations in UBQLN2 cause dominant X-linked juvenile and adult-onset ALS  
603 and ALS/dementia. *Nature*. 2011;477(7363):211–5. 10.1038/nature10353
- 604 2. Marín I. The ubiquilin gene family: Evolutionary patterns and functional  
605 insights. *BMC Evolutionary Biology*. 2014;14(1):1–22. 10.1186/1471-2148-  
606 14-63
- 607 3. Hjerpe R, Bett JS, Keuss MJ, Solovyova A, McWilliams TG, Johnson C, et al.  
608 UBQLN2 Mediates Autophagy-Independent Protein Aggregate Clearance by  
609 the Proteasome. *Cell*. 2016;166(4):935–49. 10.1016/j.cell.2016.07.001
- 610 4. Itakura E, Zavodszky E, Shao S, Wohlever ML, Keenan RJ, Hegde RS.  
611 Ubiquilins Chaperone and Triage Mitochondrial Membrane Proteins for  
612 Degradation. *Molecular Cell*. 2016;63(1):21–33.  
613 10.1016/j.molcel.2016.05.020
- 614 5. Protter DSW, Parker R. Principles and Properties of Stress Granules. *Trends in*  
615 *Cell Biology*. 2016;26(9):668–79. 10.1016/j.tcb.2016.05.004
- 616 6. Wu JJ, Cai A, Greenslade JE, Higgins NR, Fan C, Le NTT, et al. ALS/FTD  
617 mutations in UBQLN2 impede autophagy by reducing autophagosome  
618 acidification through loss of function. *Proceedings of the National Academy of*  
619 *Sciences*. 2020;2(Line 356):201917371.
- 620 7. Alexander EJ, Niaki AG, Zhang T, Sarkar J, Liu Y, Nirujogi RS, et al.  
621 Ubiquilin 2 modulates ALS/FTD-linked FUS–RNA complex dynamics and  
622 stress granule formation. *Proceedings of the National Academy of Sciences of*  
623 *the United States of America*. 2018;115(49):E11485–94.
- 624 8. Dao TP, Kolaitis RM, Kim HJ, O’Donovan K, Martyniak B, Colicino E, et al.  
625 Ubiquitin Modulates Liquid-Liquid Phase Separation of UBQLN2 via  
626 Disruption of Multivalent Interactions. *Molecular Cell*. 2018;69(6):965-  
627 978.e6.
- 628 9. Sharkey LM, Safren N, Pithadia AS, Gerson JE, Dulchavsky M, Fischer S, et  
629 al. Mutant UBQLN2 promotes toxicity by modulating intrinsic self-assembly.

- 630 Proceedings of the National Academy of Sciences. 2018;115(44):E10495–504.  
631 10.1073/pnas.1810522115
- 632 10. Subudhi I, Shorter J. Ubiquilin 2: Shuttling Clients Out of Phase? *Molecular*  
633 *Cell*. 2018;69(6):919–21. 10.1016/j.molcel.2018.02.030
- 634 11. Chang L, Monteiro MJ. Defective proteasome delivery of polyubiquitinated  
635 proteins by ubiquilin-2 proteins containing ALS mutations. *PLoS ONE*.  
636 2015;10(6):1–15. 10.1371/journal.pone.0130162
- 637 12. Dao TP, Martyniak B, Canning AJ, Lei Y, Colicino EG, Cosgrove MS, et al.  
638 ALS-Linked Mutations Affect UBQLN2 Oligomerization and Phase  
639 Separation in a Position- and Amino Acid-Dependent Manner. *Structure*.  
640 2019;27(6):937-951.e5. 10.1016/j.str.2019.03.012
- 641 13. Gilpin KM, Chang L, Monteiro MJ. ALS-linked mutations in ubiquilin-2 or  
642 hnRNPA1 reduce interaction between ubiquilin-2 and hnRNPA1. *Human*  
643 *Molecular Genetics*. 2015;24(9):2565–77. 10.1093/hmg/ddv020
- 644 14. Higgins N, Lin B, Monteiro MJ. Lou Gehrig’s Disease (ALS): UBQLN2  
645 Mutations Strike Out of Phase. *Structure*. 2019;27(6):879–81.  
646 10.1016/j.str.2019.05.006
- 647 15. Gkazi SA, Troakes C, Topp S, Miller JW, Vance CA, Sreedharan J, et al.  
648 Striking phenotypic variation in a family with the P506S UBQLN2 mutation  
649 including amyotrophic lateral sclerosis, spastic paraplegia, and frontotemporal  
650 dementia. *Neurobiology of Aging*. 2019;73:229.e5-229.e9.  
651 10.1016/j.neurobiolaging.2018.08.015
- 652 16. McCann EP, Williams KL, Fifita JA, Tarr IS, O’Connor J, Rowe DB, et al. The  
653 genotype–phenotype landscape of familial amyotrophic lateral sclerosis in  
654 Australia. *Clinical Genetics*. 2017;92(3):259–66. 10.1111/cge.12973
- 655 17. Williams KL, Warraich ST, Yang S, Solski JA, Fernando R, Rouleau GA, et  
656 al. UBQLN2/ubiquilin 2 mutation and pathology in familial amyotrophic  
657 lateral sclerosis. *Neurobiology of Aging*. 2012;33(10):2527.e3-2527.e10.  
658 10.1016/j.neurobiolaging.2012.05.008



- 659 18. Chen J, Liu X, Xu Y, Fan D. Association between rare UBQLN2 variants and  
660 amyotrophic lateral sclerosis in Chinese population. *National Medical Journal*  
661 *of China*. 2021;101(12):846–50. 10.3760/cma.j.cn112137-20201015-02835
- 662 19. Kim HJ, Kwon MJ, Choi WJ, Oh KW, Oh S il, Ki CS, et al. Mutations in  
663 UBQLN2 and SIGMAR1 genes are rare in Korean patients with amyotrophic  
664 lateral sclerosis. *Neurobiology of Aging*. 2014;35(8):1957.e7-1957.e8.  
665 10.1016/j.neurobiolaging.2014.03.001
- 666 20. Baglivo M, Manara E, Capodicasa N, Maltese PE, Stuppia L, Michelini S, et  
667 al. Early-onset of Frontotemporal Dementia and Amyotrophic Lateral Sclerosis  
668 in an Albanian Patient with a c.1319C>T Variant in the UBQLN2 Gene. *Open*  
669 *Medicine Journal*. 2020;7(1):25–31. 10.2174/1874220302007010025
- 670 21. Daoud H, Suhail H, Szuto A, Camu W, Salachas F, Meininger V, et al.  
671 UBQLN2 mutations are rare in French and French-Canadian amyotrophic  
672 lateral sclerosis. *Neurobiology of Aging*. 2012;33(9):2230.e1-2230.e5.  
673 10.1016/j.neurobiolaging.2012.03.015
- 674 22. Dillen L, van Langenhove T, Engelborghs S, Vandebulcke M, Sarafov S,  
675 Tournev I, et al. Explorative genetic study of UBQLN2 and PFN1 in an  
676 extended Flanders-Belgian cohort of frontotemporal lobar degeneration  
677 patients. *Neurobiology of Aging*. 2013;34(6):1711.e1-1711.e5.
- 678 23. Fahed AC, McDonough B, Gouvion CM, Newell KL, Dure LS, Bebin M, et al.  
679 UBQLN2 mutation causing heterogeneous X-linked dominant  
680 neurodegeneration. *Annals of Neurology*. 2014;75(5):793–8.
- 681 24. Gellera C, Tiloca C, del Bo R, Corrado L, Pensato V, Agostini J, et al. Ubiquilin  
682 2 mutations in Italian patients with amyotrophic lateral sclerosis and  
683 frontotemporal dementia. *Journal of Neurology, Neurosurgery and Psychiatry*.  
684 2013;84(2):183–7. 10.1136/jnnp-2012-303433
- 685 25. Huang X, Shen S, Fan D. No evidence for pathogenic role of UBQLN2  
686 mutations in sporadic amyotrophic lateral sclerosis in the mainland Chinese  
687 population. *PLoS ONE*. 2017;12(1):1–5. 10.1371/journal.pone.0170943
- 688 26. Lattante S, le Ber I, Camuzat A, Pariente J, Brice A, Kabashi E. Screening  
689 UBQLN-2 in French frontotemporal lobar degeneration and frontotemporal

- 690            lobar degeneration-amyotrophic lateral sclerosis patients. *Neurobiology of*  
691            *Aging.* 2013;34(8):2078.e5-2078.e6. 10.1016/j.neurobiolaging.2013.03.002
- 692        27. Luukkainen L, Helisalmi S, Kytövuori L, Ahmasalo R, Solje E, Haapasalo A,  
693        et al. Mutation Analysis of the Genes Linked to Early Onset Alzheimer's  
694        Disease and Frontotemporal Lobar Degeneration. *Journal of Alzheimer's*  
695        *Disease.* 2019;69(3):775–82. 10.3233/JAD-181256
- 696        28. McLaughlin RL, Kenna KP, Vajda A, Byrne S, Bradley DG, Hardiman O, et  
697        al. UBQLN2 mutations are not a frequent cause of amyotrophic lateral sclerosis  
698        in ireland. *Neurobiology of Aging.* 2014;35(1):267.e9-267.e11.  
699        10.1016/j.neurobiolaging.2013.07.023
- 700        29. Millecamps S, Corcia P, Cazeneuve C, Boillée S, Seilhean D, Danel-Brunaud  
701        V, et al. Mutations in UBQLN2 are rare in French amyotrophic lateral sclerosis.  
702        *Neurobiology of Aging.* 2012;33(4):839.e1-839.e3.  
703        10.1016/j.neurobiolaging.2011.11.010
- 704        30. Morgan S, Shatunov A, Sproviero W, Jones AR, Shoai M, Hughes D, et al. A  
705        comprehensive analysis of rare genetic variation in amyotrophic lateral  
706        sclerosis in the UK. *Brain.* 2017 Jun 1;140(6):1611–8. 10.1093/brain/awx082
- 707        31. Özoğuz A, Uyan Ö, Birdal G, Iskender C, Kartal E, Lahut S, et al. The distinct  
708        genetic pattern of ALS in Turkey and novel mutations. *Neurobiology of Aging.*  
709        2015;36(4):1764.e9-1764.e18. 10.1016/j.neurobiolaging.2014.12.032
- 710        32. Synofzik M, Maetzler W, Grehl T, Prudlo J, vom Hagen JM, Haack T, et al.  
711        Screening in ALS and FTD patients reveals 3 novel UBQLN2 mutations  
712        outside the PXX domain and a pure FTD phenotype. *Neurobiology of Aging.*  
713        2012;33(12):2949.e13-2949.e17. 10.1016/j.neurobiolaging.2012.07.002
- 714        33. Teyssou E, Chartier L, Amador M-D-M, Lam R, Lautrette G, Nicol M, et al.  
715        Novel UBQLN2 mutations linked to amyotrophic lateral sclerosis and atypical  
716        hereditary spastic paraplegia phenotype through defective HSP70-mediated  
717        proteolysis. *Neurobiology of Aging.* 2017 Oct;58(March):239.e11-239.e20.  
718        10.1016/j.neurobiolaging.2017.06.018

- 719 34. Tripolszki K, Gampawar P, Schmidt H, Nagy ZF, Nagy D, Klivényi P, et al.  
720 Comprehensive genetic analysis of a Hungarian amyotrophic lateral sclerosis  
721 cohort. *Frontiers in Genetics*. 2019;10(JUL). 10.3389/fgene.2019.00732
- 722 35. Ugwu F, Rollinson S, Harris J, Gerhard A, Richardson A, Jones M, et al. A  
723 UBQLN2 variant of unknown significance in frontotemporal lobar  
724 degeneration. *Neurobiology of Aging*. 2015 Jan;36(1):546.e15-546.e16.  
725 10.1016/j.neurobiolaging.2014.08.002
- 726 36. Vengoechea J, David MP, Yaghi SR, Carpenter L, Rudnicki SA. Clinical  
727 variability and female penetrance in X-linked familial FTD/ALS caused by a  
728 P506S mutation in UBQLN2. *Amyotrophic Lateral Sclerosis and*  
729 *Frontotemporal Degeneration*. 2013;14(7–8):615–9.  
730 10.3109/21678421.2013.824001
- 731 37. Vildan C, Sule D, Turker B, Hilmi U, Sibel KB. Genetic alterations of C9orf72,  
732 SOD1, TARDBP, FUS, and UBQLN2 genes in patients with Amyotrophic  
733 Lateral Sclerosis. *Cogent Medicine*. 2019;6(1):1–10.  
734 10.1080/2331205x.2019.1582400
- 735 38. Scotter EL, Smyth L, Bailey JWT, Wong C-H, de Majo M, Vance CA, et al.  
736 C9ORF72 and UBQLN2 mutations are causes of amyotrophic lateral sclerosis  
737 in New Zealand: a genetic and pathologic study using banked human brain  
738 tissue. *Neurobiology of Aging*. 2017 Jan;49:214.e1-214.e5.  
739 10.1016/j.neurobiolaging.2016.06.019
- 740 39. Brettschneider J, van Deerlin VM, Robinson JL, Kwong L, Lee EB, Ali YO, et  
741 al. Pattern of ubiquilin pathology in ALS and FTLD indicates presence of  
742 C9ORF72 hexanucleotide expansion. *Acta Neuropathologica*. 2012 Jun  
743 18;123(6):825–39. 10.1007/s00401-012-0970-z
- 744 40. Arai T, Hasegawa M, Akiyama H, Ikeda K, Nonaka T, Mori H, et al. TDP-43  
745 is a component of ubiquitin-positive tau-negative inclusions in frontotemporal  
746 lobar degeneration and amyotrophic lateral sclerosis. *Biochemical and*  
747 *Biophysical Research Communications*. 2006;351(3):602–11.  
748 10.1016/j.bbrc.2006.10.093

- 749 41. Kwiatkowski TJ, Bosco DA, LeClerc AL, Tamrazian E, Vanderburg CR, Russ  
750 C, et al. Mutations in the FUS/TLS gene on chromosome 16 cause familial  
751 amyotrophic lateral sclerosis. *Science*. 2009;323(5918):1205–8.  
752 10.1126/science.1166066
- 753 42. Maruyama H, Morino H, Ito H, Izumi Y, Kato H, Watanabe Y, et al. Mutations  
754 of optineurin in amyotrophic lateral sclerosis. *Nature*. 2010;465(7295):223–6.  
755 10.1038/nature08971
- 756 43. Neumann M, Sampathu DM, Kwong LK, Truax AC, Micsenyi MC, Chou TT,  
757 et al. Ubiquitinated TDP-43 in Frontotemporal Lobar Degeneration and  
758 Amyotrophic Lateral Sclerosis. *Science*. 2006 Oct 6;314(5796):130–3.  
759 10.1126/science.1134108
- 760 44. Vance C, Rogelj B, Hortobagyi T, de Vos KJ, Nishimura AL, Sreedharan J, et  
761 al. Mutations in FUS, an RNA Processing Protein, Cause Familial  
762 Amyotrophic Lateral Sclerosis Type 6. *Science*. 2009 Feb 27;323(5918):1208–  
763 11. 10.1126/science.1165942
- 764 45. Waldvogel HJ, Bullock JY, Synek BJ, Curtis MA, van Roon-Mom WMC,  
765 Faull RLM. The collection and processing of human brain tissue for research.  
766 *Cell and Tissue Banking*. 2008 Sep 21;9(3):169–79. 10.1007/s10561-008-  
767 9068-1
- 768 46. Murray HC, Johson K, Sedlock A, Highet B, Dieriks BV, Anekal PV, et al.  
769 Lamina-specific immunohistochemical signatures in the olfactory bulb of  
770 healthy, Alzheimer’s and Parkinson’s disease patients. *Communications*  
771 *Biology*. 2021;
- 772 47. Waldvogel HJ, Curtis MA, Baer K, Rees MI, Faull RLM.  
773 Immunohistochemical staining of post-mortem adult human brain sections.  
774 *Nature Protocols*. 2007;1(6):2719–32. 10.1038/nprot.2006.354
- 775 48. Maric D, Jahanipour J, Li XR, Singh A, Mobiny A, van Nguyen H, et al.  
776 Whole-brain tissue mapping toolkit using large-scale highly multiplexed  
777 immunofluorescence imaging and deep neural networks. *Nature*  
778 *communications*. 2021;12(1):1550. 10.1038/s41467-021-21735-x

- 779 49. Luisier F, Vonesch C, Blu T, Unser M. Fast interscale wavelet denoising of  
780 Poisson-corrupted images. *Signal Processing*. 2010;90(2):415–27.  
781 10.1016/j.sigpro.2009.07.009
- 782 50. Henden L, Wakeham D, Bahlo M. XIBD: Software for inferring pairwise  
783 identity by descent on the X chromosome. *Bioinformatics*. 2016;32(15):2389–  
784 91. 10.1093/bioinformatics/btw124
- 785 51. Li H, Glusman G, Hu H, Shankaracharya, Caballero J, Hubley R, et al.  
786 Relationship Estimation from Whole-Genome Sequence Data. *PLoS Genetics*.  
787 2014;10(1). 10.1371/journal.pgen.1004144
- 788 52. Brettschneider J, del Tredici K, Toledo JB, Robinson JL, Irwin DJ, Grossman  
789 M, et al. Stages of pTDP-43 pathology in amyotrophic lateral sclerosis. *Annals*  
790 *of Neurology*. 2013 Jul;74(1):20–38. 10.1002/ana.23937
- 791 53. Gorrie GH, Fecto F, Radzicki D, Weiss C, Shi Y, Dong H, et al. Dendritic  
792 spinopathy in transgenic mice expressing ALS/dementia-linked mutant  
793 UBQLN2. *Proceedings of the National Academy of Sciences of the United*  
794 *States of America*. 2014;111(40):14524–9. 10.1073/pnas.1405741111
- 795 54. Liu Y, Yu JT, Sun FR, Ou JR, Qu S ben, Tan L. The clinical and pathological  
796 phenotypes of frontotemporal dementia with C9ORF72 mutations. *Journal of*  
797 *the Neurological Sciences*. 2013;335(1–2):26–35. 10.1016/j.jns.2013.09.013
- 798 55. Mann DM, Rollinson S, Robinson A, Bennion Callister J, Thompson JC,  
799 Snowden JS, et al. Dipeptide repeat proteins are present in the p62 positive  
800 inclusions in patients with frontotemporal lobar degeneration and motor  
801 neurone disease associated with expansions in C9ORF72. *Acta*  
802 *Neuropathologica Communications*. 2013;1(1):1. 10.1186/2051-5960-1-68
- 803 56. Mori K, Weng SM, Arzberger T, May S, Rentzsch K, Kremmer E, et al. The  
804 C9orf72 GGGGCC repeat is translated into aggregating dipeptide-repeat  
805 proteins in FTL/ALS. *Science*. 2013;339(6125):1335–8.  
806 10.1126/science.1232927
- 807 57. Mackenzie IR, Arzberger T, Kremmer E, Troost D, Lorenzl S, Mori K, et al.  
808 Dipeptide repeat protein pathology in C9ORF72 mutation cases: Clinico-

- 809 pathological correlations. *Acta Neuropathologica*. 2013;126(6):859–79.  
810 10.1007/s00401-013-1181-y
- 811 58. Cohen-Kaplan V, Livneh I, Avni N, Fabre B, Ziv T, Kwon YT, et al. p62- and  
812 ubiquitin-dependent stress-induced autophagy of the mammalian 26S  
813 proteasome. *Proceedings of the National Academy of Sciences of the United*  
814 *States of America*. 2016;113(47):E7490–9. 10.1073/pnas.1615455113
- 815 59. Seibenhener ML, Babu JR, Geetha T, Wong HC, Krishna NR, Wooten MW.  
816 Sequestosome 1/p62 Is a Polyubiquitin Chain Binding Protein Involved in  
817 Ubiquitin Proteasome Degradation. *Molecular and Cellular Biology*.  
818 2004;24(18):8055–68. 10.1128/MCB.24.18.8055-8068.2004
- 819 60. Bjørkøy G, Lamark T, Johansen T. p62/SQSTM1: A missing link between  
820 protein aggregates and the autophagy machinery. *Autophagy*. 2006;2(2):138–  
821 9. 10.4161/auto.2.2.2405
- 822 61. Fecto F, Yan J, Vemula SP, Liu E, Yang Y, Chen W, et al. SQSTM1 Mutations  
823 in Familial and Sporadic Amyotrophic Lateral Sclerosis. *Archives of*  
824 *Neurology*. 2011 Nov 1;68(11):1440. 10.1001/archneurol.2011.250
- 825 62. Ravits J, Appel S, Baloh RH, Barohn R, Rix Brooks B, Elman L, et al.  
826 Deciphering amyotrophic lateral sclerosis: What phenotype, neuropathology  
827 and genetics are telling us about pathogenesis. *Amyotrophic Lateral Sclerosis*  
828 *and Frontotemporal Degeneration*. 2013 May 16;14(sup1):5–18.  
829 10.3109/21678421.2013.778548
- 830 63. Nguyen HP, van Broeckhoven C, van der Zee J. ALS Genes in the Genomic  
831 Era and their Implications for FTD. *Trends in Genetics*. 2018;34(6):404–23.  
832 10.1016/j.tig.2018.03.001
- 833 64. Taylor JP, Brown RH, Cleveland DW. Decoding ALS: From genes to  
834 mechanism. *Nature*. 2016;539(7628):197–206. 10.1038/nature20413
- 835 65. Ling S, Polymenidou M, Cleveland DW. Converging Mechanisms in ALS and  
836 FTD: Disrupted RNA and Protein Homeostasis. *Neuron*. 2013 Aug;79(3):416–  
837 38. 10.1016/j.neuron.2013.07.033
- 838 66. Mori K, Arzberger T, Grässer FA, Gijselinck I, May S, Rentzsch K, et al.  
839 Bidirectional transcripts of the expanded C9orf72 hexanucleotide repeat are

- 840 translated into aggregating dipeptide repeat proteins. *Acta Neuropathologica*.  
841 2013;126(6):881–93. 10.1007/s00401-013-1189-3
- 842 67. Shibata N, Hirano A, Kobayashi M, Siddique T, Deng H-X, Hung W-Y, et al.  
843 Intense Superoxide Dismutase-1 Immunoreactivity in Intracytoplasmic  
844 Hyaline Inclusions of Familial Amyotrophic Lateral Sclerosis with Posterior  
845 Column Involvement. *Journal of Neuropathology and Experimental*  
846 *Neurology*. 1996 Apr;55(4):481–90. 10.1097/00005072-199604000-00011
- 847 68. Bruijn LI, Houseweart MK, Kato S, Anderson KL, Anderson SD, Ohama E, et  
848 al. Aggregation and Motor Neuron Toxicity of an ALS-Linked SOD1 Mutant  
849 Independent from Wild-Type SOD1. *Science*. 1998 Sep 18;281(5384):1851–  
850 4. 10.1126/science.281.5384.1851
- 851 69. Keith JL, Swinkin E, Gao A, Alminawi S, Zhang M, Mcgoldrick P, et al.  
852 Neuropathologic description of CHCHD10 mutated amyotrophic lateral  
853 sclerosis. *Neurology: Genetics*. 2020;6(1). 10.1212/NXG.0000000000000394
- 854 70. Smith BN, Topp SD, Fallini C, Shibata H, Chen H-J, Troakes C, et al.  
855 Mutations in the vesicular trafficking protein annexin A11 are associated with  
856 amyotrophic lateral sclerosis. *Science Translational Medicine*. 2017 May  
857 3;9(388):eaad9157. 10.1126/scitranslmed.aad9157
- 858 71. Smith BN, Vance C, Scotter EL, Troakes C, Wong CH, Topp S, et al. Novel  
859 mutations support a role for Profilin 1 in the pathogenesis of ALS.  
860 *Neurobiology of Aging*. 2015;36(3):1602.e17-1602.e27.  
861 10.1016/j.neurobiolaging.2014.10.032
- 862 72. Teyssou E, Takeda T, Lebon V, Boillée S, Doukouré B, Bataillon G, et al.  
863 Mutations in SQSTM1 encoding p62 in amyotrophic lateral sclerosis: genetics  
864 and neuropathology. *Acta Neuropathologica*. 2013 Apr 17;125(4):511–22.  
865 10.1007/s00401-013-1090-0
- 866 73. Hirsch-Reinshagen V, Pottier C, Nicholson AM, Baker M, Hsiung GYR,  
867 Krieger C, et al. Clinical and neuropathological features of ALS/FTD with  
868 TIA1 mutations. *Acta neuropathologica communications*. 2017;5(1):96.  
869 10.1186/s40478-017-0493-x

- 870 74. Tada M, Doi H, Koyano S, Kubota S, Fukai R, Hashiguchi S, et al. Matr3 Is  
871 a Component of Neuronal Cytoplasmic Inclusions of Motor Neurons in  
872 Sporadic Amyotrophic Lateral Sclerosis. *American Journal of Pathology*.  
873 2018;188(2):507–14. 10.1016/j.ajpath.2017.10.007
- 874 75. van Deerlin VM, Leverenz JB, Bekris LM, Bird TD, Yuan W, Elman LB, et al.  
875 TARDBP mutations in amyotrophic lateral sclerosis with TDP-43  
876 neuropathology: a genetic and histopathological analysis. *The Lancet*  
877 *Neurology*. 2008 May;7(5):409–16. 10.1016/S1474-4422(08)70071-1
- 878 76. Tan RH, Kril JJ, Fatima M, McGeachie A, McCann H, Shepherd C, et al. TDP-  
879 43 proteinopathies: Pathological identification of brain regions differentiating  
880 clinical phenotypes. *Brain*. 2015;138(10):3110–22. 10.1093/brain/awv220
- 881 77. Brettschneider J, del Tredici K, Irwin DJ, Grossman M, Robinson JL, Toledo  
882 JB, et al. Sequential distribution of pTDP-43 pathology in behavioral variant  
883 frontotemporal dementia (bvFTD). *Acta Neuropathologica*. 2014;127(3):423–  
884 39. 10.1007/s00401-013-1238-y
- 885 78. Balendra R, Isaacs AM. C9orf72-mediated ALS and FTD: multiple pathways  
886 to disease. *Nature Reviews Neurology*. 2018;14(9):544–58. 10.1038/s41582-  
887 018-0047-2
- 888 79. van Blitterswijk M, DeJesus-Hernandez M, Rademakers R. How do C9ORF72  
889 repeat expansions cause amyotrophic lateral sclerosis and frontotemporal  
890 dementia. *Current Opinion in Neurology*. 2012 Dec;25(6):689–700.  
891 10.1097/WCO.0b013e32835a3efb
- 892 80. DeJesus-Hernandez M, Mackenzie IR, Boeve BF, Boxer AL, Baker M,  
893 Rutherford NJ, et al. Expanded GGGGCC Hexanucleotide Repeat in  
894 Noncoding Region of C9ORF72 Causes Chromosome 9p-Linked FTD and  
895 ALS. *Neuron*. 2011;72(2):245–56. 10.1016/j.neuron.2011.09.011
- 896 81. Murray ME, DeJesus-Hernandez M, Rutherford NJ, Baker M, Duara R, Graff-  
897 Radford NR, et al. Clinical and neuropathologic heterogeneity of c9FTD/ALS  
898 associated with hexanucleotide repeat expansion in C9ORF72. *Acta*  
899 *Neuropathologica*. 2011;122(6):673–90. 10.1007/s00401-011-0907-y



- 900 82. McEachin ZT, Gendron TF, Raj N, García-Murias M, Banerjee A, Purcell RH,  
901 et al. Chimeric Peptide Species Contribute to Divergent Dipeptide Repeat  
902 Pathology in c9ALS/FTD and SCA36. *Neuron*. 2020;107(2):292-305.e6.  
903 10.1016/j.neuron.2020.04.011
- 904 83. Freibaum BD, Taylor JP. The Role of Dipeptide Repeats in C9ORF72-Related  
905 ALS-FTD. *Frontiers in Molecular Neuroscience*. 2017;10(February):1–9.  
906 10.3389/fnmol.2017.00035
- 907 84. Lee YB, Baskaran P, Gomez-Deza J, Chen HJ, Nishimura AL, Smith BN, et  
908 al. C9orf72 poly GA RAN-translated protein plays a key role in amyotrophic  
909 lateral sclerosis via aggregation and toxicity. *Human Molecular Genetics*.  
910 2017;26(24):4765–77. 10.1093/hmg/ddx350
- 911 85. Nonaka T, Masuda-Suzukake M, Hosokawa M, Shimozawa A, Hirai S, Okado  
912 H, et al. C9ORF72 dipeptide repeat poly-GA inclusions promote intracellular  
913 aggregation of phosphorylated TDP-43. *Human Molecular Genetics*.  
914 2018;27(15):2658–70. 10.1093/hmg/ddy174
- 915 86. Lindsay RD, Scheibel AB. Quantitative analysis of dendritic branching pattern  
916 of granular cells from human dentate gyrus. *Experimental Neurology*. 1976  
917 Aug;52(2):295–310. 10.1016/0014-4886(76)90173-4
- 918 87. Amaral DG, Scharfman HE, Lavenex P. The dentate gyrus: fundamental  
919 neuroanatomical organization (dentate gyrus for dummies). *Progress in Brain  
920 Research*. 2007;163:3–22. 10.1016/S0079-6123(07)63001-5
- 921 88. May S, Hornburg D, Schludi MH, Arzberger T, Rentzsch K, Schwenk BM, et  
922 al. C9orf72 FTL/ALS-associated Gly-Ala dipeptide repeat proteins cause  
923 neuronal toxicity and Unc119 sequestration. *Acta Neuropathologica*.  
924 2014;128(4):485–503. 10.1007/s00401-014-1329-4
- 925 89. Gupta R, Lan M, Mojsilovic-Petrovic J, Choi WH, Safren N, Barmada S, et al.  
926 The proline/arginine dipeptide from hexanucleotide repeat expanded  
927 C9ORF72 inhibits the proteasome. *eNeuro*. 2017;4(1).  
928 10.1523/ENEURO.0249-16.2017
- 929 90. Zhang YJ, Gendron TF, Grima JC, Sasaguri H, Jansen-West K, Xu YF, et al.  
930 C9ORF72 poly(GA) aggregates sequester and impair HR23 and

- 931 nucleocytoplasmic transport proteins. *Nature Neuroscience*. 2016;19(5):668–  
932 77. 10.1038/nn.4272
- 933 91. van Blitterswijk M, Gendron TF, Baker MC, DeJesus-Hernandez M, Finch  
934 NA, Brown PH, et al. Novel clinical associations with specific C9ORF72  
935 transcripts in patients with repeat expansions in C9ORF72. *Acta*  
936 *Neuropathologica*. 2015 Dec 5;130(6):863–76. 10.1007/s00401-015-1480-6
- 937 92. Webster CP, Smith EF, Bauer CS, Moller A, Hautbergue GM, Ferraiuolo L, et  
938 al. The C9orf72 protein interacts with Rab1a and the ULK 1 complex to  
939 regulate initiation of autophagy . *The EMBO Journal*. 2016;35(15):1656–76.  
940 10.15252/embj.201694401
- 941 93. Wang M, Wang H, Tao Z, Xia Q, Hao Z, Prehn JHM, et al. C9orf72 associates  
942 with inactive Rag GTPases and regulates mTORC1-mediated autophagosomal  
943 and lysosomal biogenesis. *Aging Cell*. 2020;19(4):1–14. 10.1111/accel.13126
- 944 94. Boivin M, Pfister V, Gaucherot A, Ruffenach F, Negroni L, Sellier C, et al.  
945 Reduced autophagy upon C9ORF72 loss synergizes with dipeptide repeat  
946 protein toxicity in G4C2 repeat expansion disorders. *The EMBO Journal*.  
947 2020;39(4):1–15. 10.15252/embj.2018100574
- 948 95. Zhu Q, Jiang J, Gendron TF, McAlonis-Downes M, Jiang L, Taylor A, et al.  
949 Reduced C9ORF72 function exacerbates gain of toxicity from ALS/FTD-  
950 causing repeat expansion in C9orf72. *Nature Neuroscience*. 2020;23(May).  
951 10.1038/s41593-020-0619-5
- 952 96. Beckers J, Tharkeshwar AK, van Damme P. C9orf72 ALS-FTD: recent  
953 evidence for dysregulation of the autophagy-lysosome pathway at multiple  
954 levels. *Autophagy*. 2021;00(00):1–17. 10.1080/15548627.2021.1872189
- 955 97. Sellier C, Campanari M, Julie Corbier C, Gaucherot A, Kolb-Cheynel I, Oulad-  
956 Abdelghani M, et al. Loss of C9ORF72 impairs autophagy and synergizes with  
957 polyQ Ataxin-2 to induce motor neuron dysfunction and cell death. *The EMBO*  
958 *Journal*. 2016;35(12):1276–97. 10.15252/embj.201593350
- 959 98. Renaud L, Picher-Martel V, Codron P, Julien J. Key role of UBQLN2 in  
960 pathogenesis of amyotrophic lateral sclerosis and frontotemporal dementia.

- 961 Acta Neuropathologica Communications. 2019 Dec 18;7(1):103.  
962 10.1186/s40478-019-0758-7
- 963 99. Zhang KY, Yang S, Warraich ST, Blair IP. Ubiquilin 2: A component of the  
964 ubiquitin-proteasome system with an emerging role in neurodegeneration.  
965 International Journal of Biochemistry and Cell Biology. 2014;50(1):123–6.  
966 10.1016/j.biocel.2014.02.018
- 967 100. Sharkey LM, Sandoval-Pistorius SS, Moore SJ, Gerson JE, Komlo R, Fischer  
968 S, et al. Modeling UBQLN2-mediated neurodegenerative disease in mice:  
969 Shared and divergent properties of wild type and mutant UBQLN2 in phase  
970 separation, subcellular localization, altered proteostasis pathways, and  
971 selective cytotoxicity. Neurobiology of Disease. 2020;143(June).  
972 10.1016/j.nbd.2020.105016
- 973 101. Al-Sarraj S, King A, Troakes C, Smith B, Maekawa S, Bodi I, et al. p62  
974 positive, TDP-43 negative, neuronal cytoplasmic and intranuclear inclusions in  
975 the cerebellum and hippocampus define the pathology of C9orf72-linked  
976 FTLN and MND/ALS. Acta Neuropathologica. 2011 Dec 19;122(6):691–702.  
977 10.1007/s00401-011-0911-2
- 978 102. Piras A, Collin L, Grüniger F, Graff C, Rönnbäck A. Autophagic and  
979 lysosomal defects in human tauopathies: analysis of post-mortem brain from  
980 patients with familial Alzheimer disease, corticobasal degeneration and  
981 progressive supranuclear palsy. Acta neuropathologica communications.  
982 2016;4:22. 10.1186/s40478-016-0292-9
- 983 103. Babu JR, Geetha T, Wooten MW. Sequestosome 1/p62 shuttles  
984 polyubiquitinated tau for proteasomal degradation. Journal of Neurochemistry.  
985 2005;94(1):192–203. 10.1111/j.1471-4159.2005.03181.x
- 986 104. Zatloukal K, Stumpner C, Fuchsichler A, Heid H, Schnoelzer M, Kenner L,  
987 et al. P62 Is a Common Component of Cytoplasmic Inclusions in Protein  
988 Aggregation Diseases. American Journal of Pathology. 2002;160(1):255–63.  
989 10.1016/S0002-9440(10)64369-6

- 990 105. Kuusisto E, Salminen A, Alafuzoff I. Ubiquitin-binding protein p62 is present  
991 in neuronal and glial inclusions in human tauopathies and synucleinopathies.  
992 *NeuroReport*. 2001;12(10):2085–90. 10.1097/00001756-200107200-00009
- 993 106. Richards S, Aziz N, Bale S, Bick D, Das S, Gastier-Foster J, et al. Standards  
994 and guidelines for the interpretation of sequence variants: A joint consensus  
995 recommendation of the American College of Medical Genetics and Genomics  
996 and the Association for Molecular Pathology. *Genetics in Medicine*.  
997 2015;17(5):405–24. 10.1038/gim.2015.30
- 998 107. Ramstetter MD, Dyer TD, Lehman DM, Curran JE, Duggirala R, Blangero J,  
999 et al. Benchmarking relatedness inference methods with genome-wide data  
1000 from thousands of relatives. *Genetics*. 2017;207(1):75–82.  
1001 10.1534/genetics.117.1122
- 1002
- 1003

1004 **Tables**

1005 **Table 1.** IBD segments inferred over *UBQLN2* on the X chromosome (chromosome 23).

1006

| <b>Individual 1</b> |                    | <b>Individual 2</b> |                      | <b>StartSNP</b> | <b>EndSNP</b> | <b>Start Pos(bp)</b> | <b>End Pos(bp)</b> |
|---------------------|--------------------|---------------------|----------------------|-----------------|---------------|----------------------|--------------------|
| <b>Family ID</b>    | <b>Pedigree ID</b> | <b>Family ID</b>    | <b>Individual ID</b> |                 |               |                      |                    |
| FALS5               | III:8              | FALS5               | IV:9                 | rs17330993      | rs11156600    | 2779749              | 154440161          |
| FALS5               | III:8              | FALS5               | IV:18 <sup>a</sup>   | rs7062445       | rs6423133     | 19650411             | 123608292          |
| FALS5               | III:8              | FALS14              | III:2                | rs952836        | rs17315029    | 40344087             | 129605268          |
| FALS5               | IV:9               | FALS5               | IV:18                | rs6628597       | rs6423133     | 31382037             | 123608292          |
| FALS5               | IV:9               | FALS14              | III:2                | rs952836        | rs17277770    | 40344087             | 132774456          |
| FALS5               | IV:18              | FALS14              | III:2                | rs952836        | rs6423133     | 40344087             | 123608292          |

1007

1008

<sup>a</sup> FALS5 IV:18 is also referred to as MN17 in this report.

1009 **Table 2.** Estimated degree of relatedness and fraction of genome with zero, one, and two  
 1010 alleles identical-by-descent (IBD) between all samples in *UBQLN2* p.T487I-linked  
 1011 families FALS5 and FALS14.  
 1012

|              | Individual 1 |             | Individual 2 |                    | Fraction IBD=0 | Fraction IBD=1 | Fraction IBD=2 | Degree <sup>a</sup> |
|--------------|--------------|-------------|--------------|--------------------|----------------|----------------|----------------|---------------------|
|              | Family ID    | Pedigree ID | Family ID    | Individual ID      |                |                |                |                     |
| Intra-family | FALS5        | III:8       | FALS5        | IV:9               | 0.529          | 0.471          | 0              | 2                   |
|              | FALS5        | III:8       | FALS5        | IV:18 <sup>b</sup> | 0.529          | 0.471          | 0              | 2                   |
|              | FALS5        | IV:9        | FALS5        | IV:18              | 0.751          | 0.249          | 0              | 3                   |
|              | FALS14       | II:1        | FALS14       | III:2              | 0.515          | 0.485          | 0              | 2                   |
| Inter-family | FALS5        | III:8       | FALS14       | II:1               | 0.877          | 0.123          | 0              | 4                   |
|              | FALS5        | III:8       | FALS14       | III:2              | 0.927          | 0.073          | 0              | 5                   |
|              | FALS5        | IV:9        | FALS14       | II:1               | 0.942          | 0.058          | 0              | 5                   |
|              | FALS5        | IV:9        | FALS14       | III:2              | 0.948          | 0.052          | 0              | 5                   |
|              | FALS5        | IV:18       | FALS14       | II:1               | 0.926          | 0.074          | 0              | 5                   |
|              | FALS5        | IV:18       | FALS14       | III:2              | 0.948          | 0.052          | 0              | 5                   |

1013 <sup>a</sup> Degrees of relatedness as per [107]:

1014 2 – Grandparent-grandchild, Avuncular, Half-sibling

1015 3 – First cousin, Great-grandparent, Grand-avuncular

1016 4 – First cousin once removed, GG-grandparent

1017 5 – Second cousin, First cousin twice removed

1018 <sup>b</sup> FALS5 IV:18 is also referred to as MN17 in this report.

1019

## 1020 **Figure legends**

1021 **Figure 1. Ubiquilin 2 labelling in previous studies fails to discriminate between**  
1022 ***UBQLN2*-linked and other genotypes of ALS/FTD.** Previously published  
1023 immunohistochemical analyses of the spinal cord, and hippocampus molecular layer (ML),  
1024 granule cell layer (GCL), and cornus ammonus (CA) regions fail to discriminate between  
1025 *UBQLN2*-linked ALS/FTD and ALS/FTD with other genotypes. Key shown within figure.  
1026 Spinal cord ubiquilin 2 pathology (green) is reported to be present when ubiquilin 2 is  
1027 either mutant or wildtype, occurring in *UBQLN2*-linked and *C9ORF72*-linked ALS/FTD,  
1028 “ALS-dementia” (later confirmed to be *C9ORF72*-positive), *FUS*-linked ALS, and  
1029 sporadic ALS (sALS). Spinal cord ubiquilin 2 pathology is found together with ubiquitin  
1030 (orange), p62 (dark pink), TDP-43 (yellow), and *FUS* (blue) aggregates. Similarly,  
1031 hippocampal ubiquilin 2 pathology is reported when ubiquilin 2 is either mutant or  
1032 wildtype; being present in the molecular layer in *UBQLN2*-linked and *C9ORF72*-linked  
1033 ALS/FTD (including “ALS-dementia”) but not in sALS; and in the granule cell layer in  
1034 *C9ORF72*-linked ALS/FTD (including “ALS-dementia”). Hippocampal granule cell layer  
1035 ubiquilin 2 pathology is found together with dipeptide repeats (DPRs, pale red) with or  
1036 without TDP-43; but is variably present in *UBQLN2*-linked ALS/FTD and sALS. In the  
1037 hippocampal CA regions, ubiquilin 2 is present in *UBQLN2*-linked and *C9ORF72*-linked  
1038 ALS/FTD (including “ALS-dementia”). Hippocampal CA region ubiquilin 2 pathology is  
1039 found together with DPRs, ubiquitin and p62.

1040

1041 **Figure 2. Ubiquilin 2 and pTDP-43 pathology in the hippocampal granule cell layer**  
1042 **and molecular layer.** Sections from 5 sporadic ALS cases (A-F) demonstrated variable  
1043 perinuclear pTDP-43 aggregate load in the granule cell layer (A-F, A1-F1, white  
1044 arrowheads). These aggregates were all devoid of ubiquilin 2 co-labelling. All *UBQLN2*-  
1045 linked ALS/FTD cases (G-J) showed ubiquilin 2-positive (G1, H1, I1', J2', green  
1046 arrowheads), pTDP-43-negative (G2, H2, I2'', J2'') punctate aggregates in the molecular  
1047 layer, with the exception of one aggregate found in ALS+FTD case V:7 – p.T487I which  
1048 showed co-deposition of both proteins in this region (I, white arrow). ALS+FTD cases V:7  
1049 – p.T487I and p.P506S showed rare granule cell layer pTDP-43 aggregates independent of  
1050 ubiquilin 2 (I2', I2'', J3', J3'', white arrowheads). Only in p.P506S were the numerous

1051 compact pTDP-43 aggregates found in the granule cell layer co-localised with ubiquilin 2  
1052 (**J1**, unfilled green arrowheads). *C9ORF72*-linked ALS cases MN2, MN18, and MN23 (**K-**  
1053 **L**), were devoid of pTDP-43 pathology in the molecular (**K1**, **L1**, **M1**, green arrowheads)  
1054 and granule cell layers (**K2**, **L2**, **M2**, green arrowheads) but showed wispy, and stellate  
1055 ubiquilin 2 aggregates in these layers, respectively. Similarly, dendritic ubiquilin 2  
1056 inclusions were observed in the molecular layer of *C9ORF72*-linked ALS case MN28,  
1057 aggregating alone (**N2'**, **N2''**). Unique to MN28 were granule cell layer perinuclear pTDP-  
1058 43 inclusions, often found aggregating independently (**N3''**, white arrowheads). Stellate  
1059 ubiquilin 2 aggregates were observed in the granule cell layer which very rarely co-  
1060 localised with pTDP-43 (**N1**, unfilled green arrowhead) or more commonly alone (**N1**, **N3'**,  
1061 green arrowhead). Scale bar in main images, 50  $\mu\text{m}$ ; in insets A1-F1, J1, N1, 10  $\mu\text{m}$ ; all  
1062 other zooms, 5  $\mu\text{m}$ .

1063

1064 **Figure 3. Ubiquilin 2 and DPR pathology in hippocampal granule cell layer and**  
1065 **molecular layer.** All *UBQLN2*-linked cases (**A-D**) displayed characteristic molecular layer  
1066 ubiquilin 2 aggregates (**A1-D1**), with granule cell layer ubiquilin 2 aggregates only seen in  
1067 case p.P506S (**D2**). All *UBQLN2*-linked cases were DPR-negative (**A1'-D1'**, **A1''-D1''**).  
1068 In *C9ORF72*-linked ALS cases (**E-H**), skein-like ubiquilin 2 aggregates in the molecular  
1069 layer were DPR-negative (**E1'-H1'**, **E1''-H1''**), but granule cell layer ubiquilin 2  
1070 aggregates always co-localised with either polyGA alone (**E2'-H2'**, **E2''-H2''**, yellow  
1071 arrowheads) or both polyGA and polyGP proteins (not shown). Pink arrowheads indicate  
1072 co-localised DPRs not ubiquilin 2-labelled (**E2-H2''**). Scale bar in main images, 50  $\mu\text{m}$ ;  
1073 insets, 10  $\mu\text{m}$ . Super-resolution STED microscopy of co-localised ubiquilin 2-polyGA  
1074 aggregates in *C9ORF72*-linked ALS case MN28 demonstrated ubiquilin 2 aggregation  
1075 around a core of aggregated polyGA (**I-I''**) or polyGA enmeshed with and encircling  
1076 ubiquilin 2 (**J-J''**). Scale bar, 1  $\mu\text{m}$ .

1077

1078 **Figure 4. Mutant ubiquilin 2 was p62 positive in hippocampal molecular layer.** Four  
1079 *UBQLN2*-linked ALS/FTD cases (**A-D**) showed abundant, compact ubiquilin 2 aggregates  
1080 in the molecular layer, predominantly co-localised with p62 (**A-D''**, orange arrowheads)  
1081 but occasionally not (**A-D''**, green arrowheads). *C9ORF72*-linked ALS case MN28 (**E**)



1082 showed analogous ubiquilin 2 aggregates in the molecular layer but these were mostly  
1083 devoid of p62 (**E-E''**, green arrowheads), with infrequent p62 co-labelling of larger  
1084 ubiquilin 2 aggregates (**E', E''**, orange arrowhead). Maximum intensity Z-projections with  
1085 orthogonal planes of the molecular layer confirmed that almost all mutant ubiquilin 2  
1086 aggregates in *UBQLN2*-linked ALS+FTD case p.P506S were compact and p62-labelled (**F**,  
1087 white dotted outline,  $z= 22.25 \mu\text{m}$ ) with very few ubiquilin 2 aggregates that were p62-  
1088 negative (**F**, green arrowheads), while the majority of wildtype ubiquilin 2 in *C9ORF72*-  
1089 linked case MN28 were wispy and p62-negative (**G**, white dotted outline,  $z= 13 \mu\text{m}$ ). Scale  
1090 bar, 10  $\mu\text{m}$ .

1091

1092 **Figure 5. Combined pTDP-43, ubiquilin 2, p62, and dipeptide repeat protein**  
1093 **immunohistochemical staining discriminates between sporadic and *C9ORF72*-linked**  
1094 **ALS, and *UBQLN2*-linked ALS/FTD.** Combined immunohistochemical analyses of the  
1095 hippocampal molecular layer (ML) and granule cell layer (GCL) fully discriminate  
1096 between *UBQLN2*-linked ALS/FTD, *C9ORF72*-linked ALS, and ALS with other  
1097 genotypes. Key shown within figure. pTDP-43 pathology (boxed '+' symbol on yellow  
1098 box) is present in the hippocampal granule cell layer in some sALS cases (6/19, 32%).  
1099 Ubiquilin 2 pathology (pale pink) is present in the hippocampus when ubiquilin 2 is mutant  
1100 (*UBQLN2*-linked ALS/FTD) and when wildtype (*C9ORF72*-linked ALS). Blue outlines  
1101 indicate unique aggregation features of *C9ORF72*-linked ALS and *UBQLN2*-linked  
1102 ALS/FTD hippocampal pathology. Wildtype ubiquilin 2 in *C9ORF72*-linked ALS  
1103 molecular layer is p62-negative, and associated with granule cell layer polyGA, polyGP,  
1104 and ubiquilin 2-positive aggregates that were pTDP-43 positive in only one case, and even  
1105 then only rarely. Mutant ubiquilin 2 in *UBQLN2*-linked ALS/FTD molecular layer is p62-  
1106 positive, and associated with granule cell layer pTDP-43 aggregates only in some cases  
1107 and which may or may not be ubiquilin 2-labelled.

1108

1109 **Figure 6. Schematic representation of the hippocampal neuropathological signature**  
1110 **defining *UBQLN2*-linked ALS.** In *UBQLN2*-linked ALS/FTD cases without hippocampal  
1111 pTDP-43 proteinopathy, mutant ubiquilin 2 is punctate, p62 positive, and forms aggregates  
1112 exclusively in the molecular layer (cases p.P497H and MN17 – p.T487I). In *UBQLN2*-

1113 linked ALS/FTD cases with hippocampal pTDP-43 proteinopathy, in addition to punctate  
1114 p62-positive ubiquilin 2 aggregates in the molecular layer, there are granule cell layer  
1115 pTDP-43 aggregates that are either; frequent and ubiquilin 2-labelled (case p.P506S), or  
1116 rare and ubiquilin 2-negative (case V:7-p.T487I), suggesting a pathological cascade in  
1117 which granule cell layer pTDP-43 aggregates provide a scaffold around which mutant  
1118 ubiquilin 2 can aggregate. Image created in Biorender.com



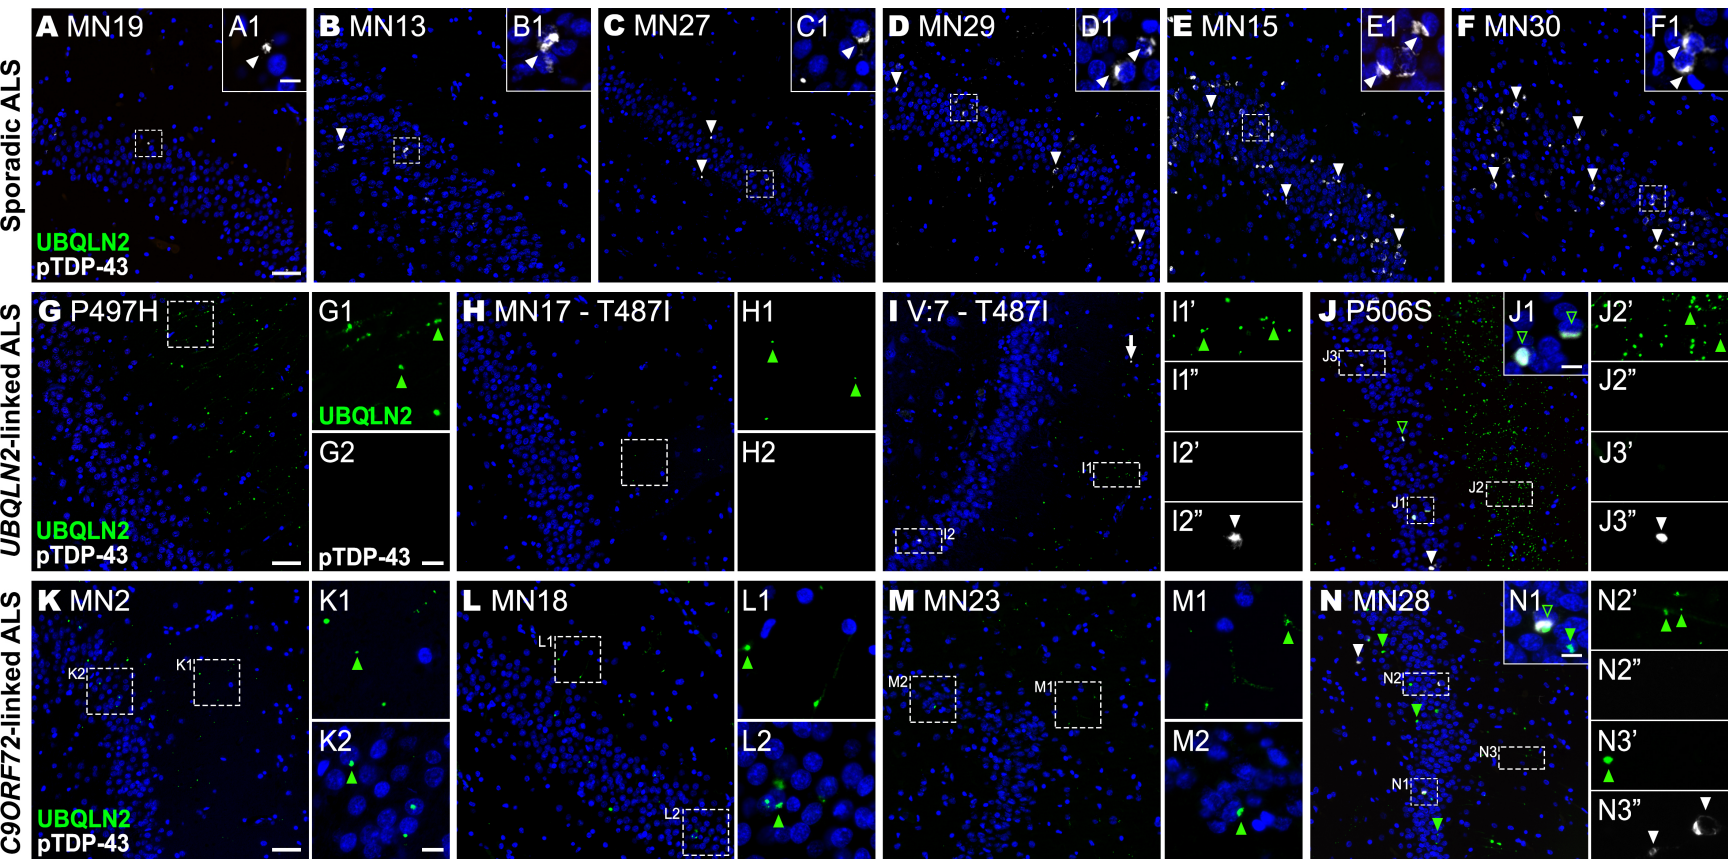

UBQLN2-linked ALS

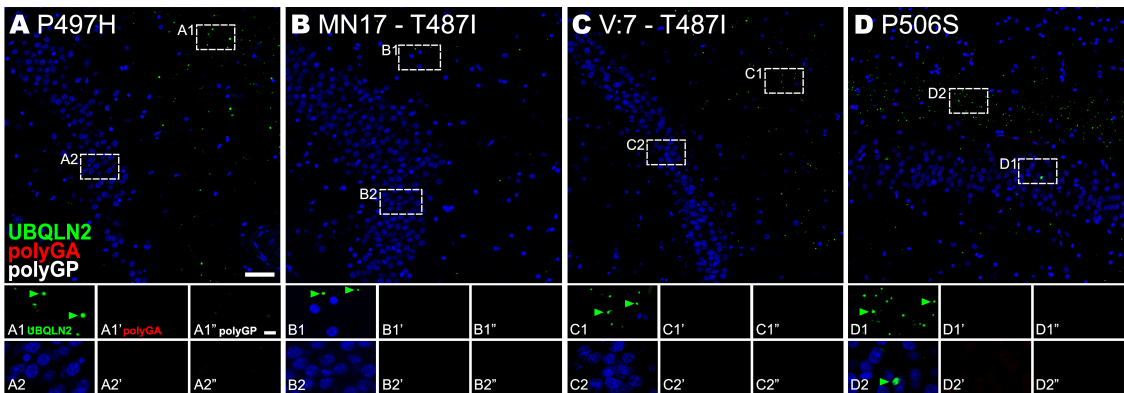

C9ORF72-linked ALS

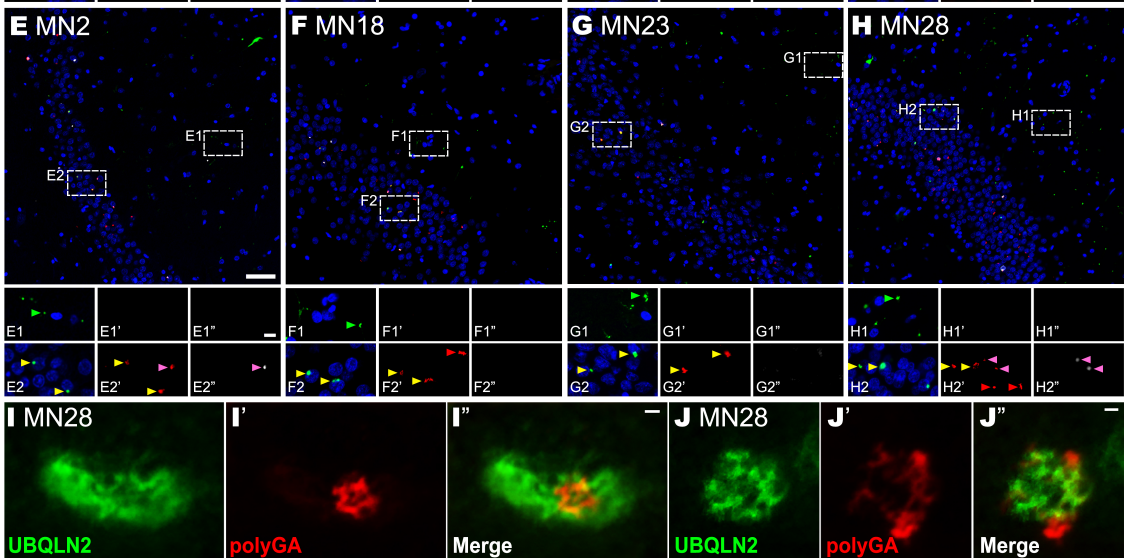

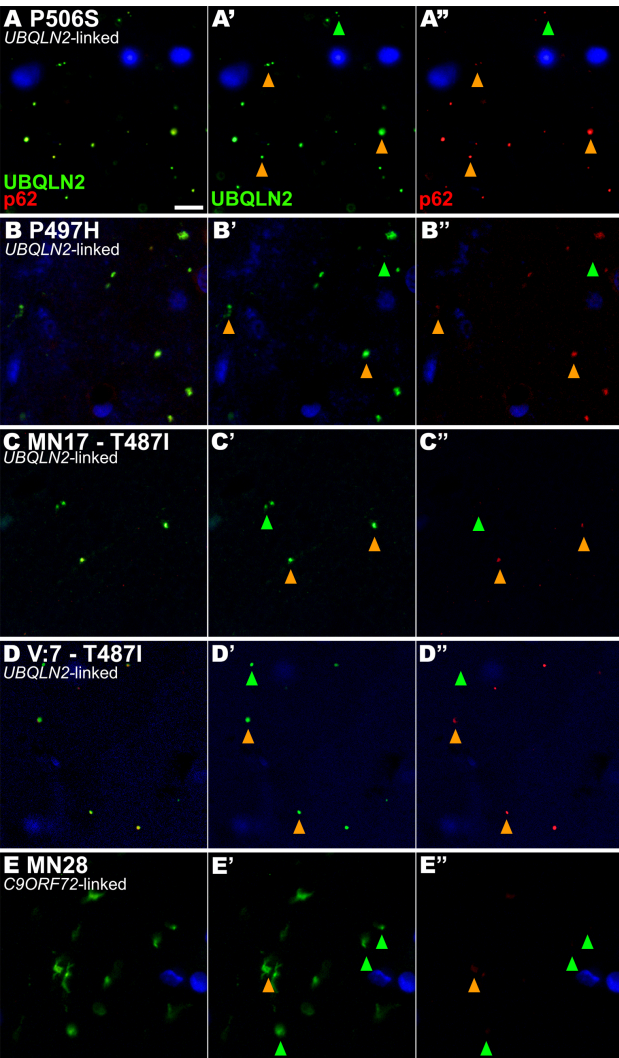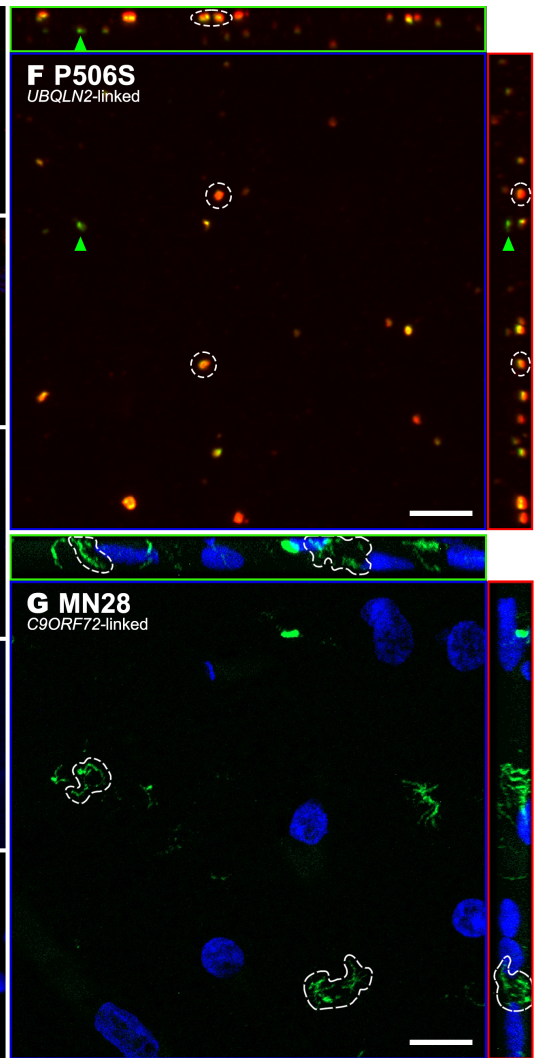

| Genetic classification          | Case & mutation                  | Diagnosis        | Pathological co-localisation |         |
|---------------------------------|----------------------------------|------------------|------------------------------|---------|
|                                 |                                  |                  | ML                           | GCL     |
| Neurologically Normal (n=5)     | H211                             | NN               |                              |         |
|                                 | H230                             | NN               |                              |         |
|                                 | H238                             | NN               |                              |         |
|                                 | H239                             | NN               |                              |         |
|                                 | H247                             | NN               |                              |         |
| Unknown Familial ALS (n=3)      | MN11                             | MND-ALS          |                              |         |
|                                 | MN14                             | Probable MND-ALS |                              |         |
|                                 | MN21                             | MND-ALS          |                              |         |
| <i>SOD1</i> -linked ALS (n=1)   | MN24; E101G                      | MND-ALS          |                              |         |
| Sporadic ALS (n=19)             | MN4                              | MND-ALS          |                              |         |
|                                 | MN8                              | MND-ALS          |                              |         |
|                                 | MN9                              | MND-ALS          |                              |         |
|                                 | MN10                             | MND-ALS          |                              |         |
|                                 | MN12                             | MND-ALS          |                              |         |
|                                 | MN20                             | MND-ALS          |                              |         |
|                                 | MN22                             | MND-ALS          |                              |         |
|                                 | MN25                             | MND-ALS          |                              |         |
|                                 | MN5                              | MND-ALS          |                              |         |
|                                 | MN6                              | MND-ALS          |                              |         |
|                                 | MN16                             | MND-ALS          |                              |         |
|                                 | MN26                             | MND-ALS          |                              |         |
|                                 | MN19                             | MND-ALS          |                              | +       |
|                                 | MN13                             | MND-ALS          |                              | +       |
|                                 | MN27                             | MND-ALS/LBD-bs   |                              | +       |
|                                 | MN29                             | MND-ALS          |                              | +       |
|                                 | MN15                             | MND-ALS + FTD    |                              | +       |
|                                 | MN30                             | MND-ALS          |                              | +       |
|                                 | <i>C9ORF72</i> -linked ALS (n=4) | MN2              | MND-ALS                      | +       |
| MN18                            |                                  | MND-ALS          | +                            | + + +   |
| MN23                            |                                  | MND-ALS          | +                            | + + +   |
| MN28                            |                                  | MND-ALS          | +                            | + + + + |
| <i>UBQLN2</i> -linked ALS (n=4) | MN17 - T487I                     | MND-ALS + FTD    | + +                          |         |
|                                 | P497H                            | MND-ALS          | + +                          |         |
|                                 | V7 - T487I                       | MND-ALS + FTD    | + +                          | +       |
|                                 | P506S                            | MND-ALS + FTD    | + +                          | + +     |

**Key**

pTDP-43   
 UBQLN2   
 p62   
 polyGA   
 polyGP   
 Stage 4 ALS

 Presence of pathology   
 Absence of pathology   
**ML** Molecular layer   
**GCL** Granular cell layer

# UBQLN2-linked

Hippocampal pTDP-43

-

+

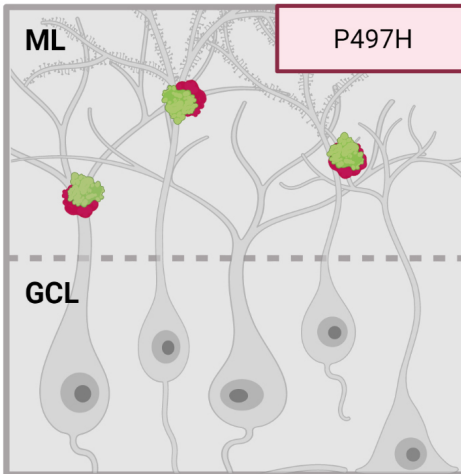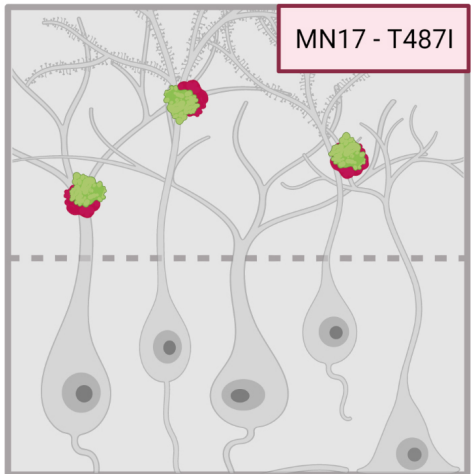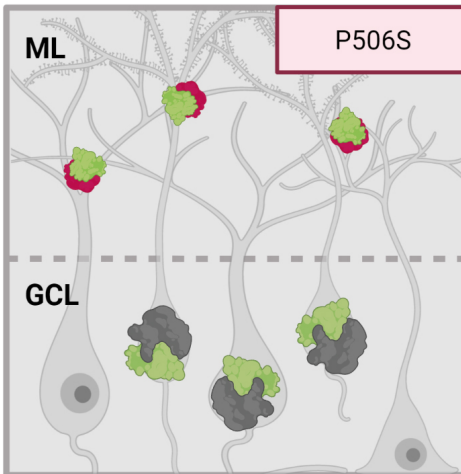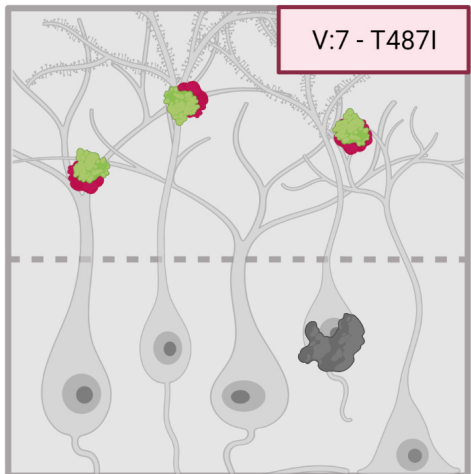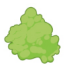

UBQLN2

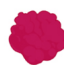

p62

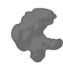

pTDP-43
